# Supplementary material for: Interventions to improve outcomes for caregivers of patients with advanced cancer: a meta-analysis
Source: PubMed Central journal article supplement (PMC10407714; doi:10.1093/jnci/djad075), 2023-06-05
Supplement: djad075_supplementary_data.pdf [file djad075_supplementary_data.pdf]

## **Supplementary Material**

**Supplementary Methods 1. Search Strategy**

**Supplementary Methods 2. Study Inclusion and Exclusion Criteria**

**Supplementary Methods 3. Methodological Details Regarding Risk of Bias Assessment**

**Supplementary Table 1. Study Characteristics, of Interventions Directed at Caregivers**

**Supplementary Table 2. Study Characteristics, of Interventions Directed at Patient-Caregiver Dyad**

**Supplementary Table 3. Study Characteristics, of Interventions Directed at Patients and Their Families**

**Supplementary Figure 1. Cochrane Risk of Bias Assessment. 1.1 By Study; 1.2 Summary**

**Supplementary Figure 2. Funnel Plots, for Assessment of Publication Bias at 1-3 Months. 2.1 Overall Quality of Life ( $p=0.039$ ); 2.2 Physical Well-being ( $p=0.018$ ); 2.3 Mental Well-being ( $p=0.042$ ); 2.4 Anxiety ( $p=0.828$ ); 2.5 Depression ( $p=0.051$ )**

**Supplementary Figure 3. Caregiver-Reported Outcomes at 4-6 Months. 3.1 Overall Quality of Life; 3.2 Physical Well-Being; 3.3 Mental Well-Being; 3.4 Anxiety; 3.5 Depression**

## Supplementary Methods 1. Search Strategy

Database: Ovid MEDLINE(R) and Epub Ahead of Print, In-Process & Other Non-Indexed Citations, Daily and Versions(R) <1946 to June 14, 2021> Search Strategy:

---

- 1 exp Neoplasms/ (3480493)
- 2 (cancer or neoplasm\* or carcinoma or tumor or tumour).mp. (4142314)
- 3 or/1-2 (4566582)
- 4 exp Caregivers/ (40010)
- 5 exp Family/ (332099)
- 6 exp Spouses/ (10620)
- 7 (caregiver\* or "care giver\*" or carer\* or spouse\* or husband\* or wife or wives or sibling\* or brother\* or sister\* or partner\* or parent\* or family or clerg\* or supportive care or ((people or individual\*) adj "caring for patient\*")).mp. (1806474)
- 8 or/4-7 (1874499)
- 9 exp "Quality of Life"/ (212711)
- 10 ("quality of life" or "quality of lives").mp. (376337)
- 11 exp Mental Health/ (44112)
- 12 exp Mental Health Services/ (99007)
- 13 exp Mental Disorders/ (1292281)
- 14 mental health.mp. (213934)
- 15 exp Depression/ (128501)
- 16 exp Depressive Disorder/ (112964)
- 17 (depression or depressive or affective).mp. (537844)
- 18 exp Anxiety/ (92468)
- 19 exp Anxiety Disorders/ (82143)
- 20 anxiety.mp. (257566)
- 21 distress.mp. (144080)
- 22 exp Adaptation, Psychological/ (131291)
- 23 (cope\* or coping).mp. (109547)
- 24 burden.mp. (253218)
- 25 exp Bereavement/ (13790)
- 26 bereavement.mp. (9111)
- 27 exp Grief/ (9116)
- 28 (grief\* or griev\*).mp. (15421)
- 29 stress.mp. (989082)
- 30 exp Stress, Psychological/ (138837)
- 31 exp Adaptation, Psychological/ (131291)
- 32 exp Self Efficacy/ (21646)
- 33 self efficacy.mp. (39710)
- 34 exp Self Concept/ (114116)
- 35 (confidence or confident).mp. (574612)
- 36 mastery.mp. (6670)
- 37 (preparedness or prepared).mp. (440593)
- 38 appraisal.mp. (40827)

- 39 or/9-38 (4316905)
- 40 3 and 8 and 39 (44845)
- 41 limit 40 to clinical trial, all (2274)
- 42 ((randomized or randomised or controlled) adj2 (trial or study or experiment)).ti. (179573)
- 43 Randomized controlled trial/ or Randomized controlled trials as Topic/ or Random allocation/ or Double blind method/ or Single blind method/ (791179)
- 44 Clinical trial/ or Clinical Trials as Topic/ (655124)
- 45 ((singl\$ or doubl\$ or treb\$ or tripl\$) adj (blind\$3 or mask\$3)).tw. or Placebos/ or Placebo\$.tw. or Randomly allocated.tw. or (allocat\$ adj3 random\$).tw. or random\*.tw. or blind\*.tw. (1439182)
- 46 Case reports/ or Letter/ or Historical article/ (3461565)
- 47 (42 or 43 or (44 and 45)) not 46 (854200)
- 48 40 and 47 (2552)
- 49 41 or 48 (3165)
- 50 limit 49 to english language (3065)

Database: Embase Classic+Embase <1947 to 2021 Week 23> Search Strategy:

- 
- 1 exp neoplasm/ (5192218)
  - 2 (cancer or neoplasm\* or carcinoma or tumor or tumour).mp. (5819858)
  - 3 or/1-2 (6516360)
  - 4 exp caregiver/ (90122)
  - 5 exp caregiver burden/ (8557)
  - 6 exp Caregiver Strain Index/ (296)
  - 7 exp caregiver support/ (3661)
  - 8 exp family/ (589087)
  - 9 exp spouse/ (21384)
  - 10 (caregiver\* or "care giver\*" or carer\* or spouse\* or husband\* or wife or wives or sibling\* or brother\* or sister\* or partner\* or parent\* or family or clerg\* or supportive care or ((people or individual\*) adj "caring for patient\*")).mp. (2285571)
  - 11 or/4-10 (2444749)
  - 12 exp "quality of life"/ (534974)
  - 13 ("quality of life" or "quality of lives").mp. (651517)
  - 14 exp mental health/ (181495)
  - 15 exp mental health service/ (62620)
  - 16 exp mental disease/ (2463699)
  - 17 mental health.mp. (328639)
  - 18 exp depression/ (518944)
  - 19 (depression or depressive or affective).mp. (831894)
  - 20 exp anxiety/ (240869)
  - 21 exp anxiety disorder/ (267741)
  - 22 exp anxiety assessment/ (50196)
  - 23 anxiety.mp. (412911)
  - 24 exp distress syndrome/ (49529)

- 25 distress.mp. (248244)
- 26 exp coping behavior/ (70884)
- 27 (cope\* or coping).mp. (164406)
- 28 exp caregiver burden/ (8557)
- 29 burden.mp. (369884)
- 30 exp caregiver strain index/ (296)
- 31 exp bereavement/ (9598)
- 32 exp bereavement support/ (886)
- 33 bereavement.mp. (12373)
- 34 exp grief/ (14131)
- 35 (grief\* or griev\*).mp. (17505)
- 36 exp stress/ (337445)
- 37 exp mental stress/ (90876)
- 38 stress.mp. (1396947)
- 39 exp self concept/ (220223)
- 40 self efficacy.mp. (38235)
- 41 (confidence or confident).mp. (720386)
- 42 mastery.mp. (8403)
- 43 (preparedness or prepared).mp. (566324)
- 44 appraisal.mp. (47696)
- 45 or/12-44 (6280356)
- 46 3 and 11 and 45 (88860)
- 47 limit 46 to (clinical trial or randomized controlled trial or controlled clinical trial or multicenter study or phase 1 clinical trial or phase 2 clinical trial or phase 3 clinical trial or phase 4 clinical trial) (8102)
- 48 Randomized controlled trial/ (663183)
- 49 ((randomized or randomised or controlled) adj2 (trial or study)).ti. (229062)
- 50 Clinical trial/ (1025746)
- 51 Randomization/ or Single blind procedure/ or Double blind procedure/ or Crossover procedure/ or Placebo/ or Randomized controlled trial\$.tw. or Rct.tw. or Random allocation.tw. or Randomly allocated.tw. or Allocated randomly.tw. or (allocated adj2 random).tw. or Single blind\$.tw. or Double blind\$.tw. or ((treble or triple) adj blind\$.tw. or Placebo\$.tw. or Prospective study/ (1611480)
- 52 50 and 51 (348108)
- 53 Case study/ or Case report/ or Abstract report/ or letter/ (3784340)
- 54 (48 or 49 or 52) not 53 (860475)
- 55 46 and 54 (3994)
- 56 47 or 55 (8277)
- 57 limit 56 to english language (8104)

Database: EBM Reviews - Cochrane Central Register of Controlled Trials <May 2021>

Search Strategy:

- 1 exp Neoplasms/ (82227)
- 2 (cancer or neoplasm\* or carcinoma or tumor or tumour).mp. (233102)
- 3 or/1-2 (243261)

4 exp Caregivers/ (2230)  
5 exp Family/ (9686)  
6 exp Spouses/ (374)  
7 (caregiver\* or "care giver\*" or carer\* or spouse\* or husband\* or wife or wives or sibling\* or  
brother\* or sister\* or partner\* or parent\* or family or clerg\* or supportive care or ((people or  
individual\*) adj "caring for patient\*")).mp. (105682)  
8 or/4-7 (107224)  
9 exp "Quality of Life"/ (25037)  
10 ("quality of life" or "quality of lives").mp. (121067)  
11 exp Mental Health/ (1634)  
12 exp Mental Health Services/ (6958)  
13 exp Mental Disorders/ (72096)  
14 mental health.mp. (22974)  
15 exp Depression/ (12808)  
16 exp Depressive Disorder/ (12610)  
17 (depression or depressive or affective).mp. (93277)  
18 exp Anxiety/ (8209)  
19 exp Anxiety Disorders/ (9438)  
20 anxiety.mp. (56669)  
21 distress.mp. (22939)  
22 exp Adaptation, Psychological/ (5421)  
23 (cope\* or coping).mp. (13667)  
24 burden.mp. (24596)  
25 exp Bereavement/ (231)  
26 bereavement.mp. (483)  
27 exp Grief/ (132)  
28 (grief\* or griev\*).mp. (645)  
29 stress.mp. (64656)  
30 exp Stress, Psychological/ (6222)  
31 exp Adaptation, Psychological/ (5421)  
32 exp Self Efficacy/ (3253)  
33 self efficacy.mp. (14276)  
34 exp Self Concept/ (6869)  
35 (confidence or confident).mp. (87309)  
36 mastery.mp. (1047)  
37 (preparedness or prepared).mp. (12232)  
38 appraisal.mp. (2149)  
39 or/9-38 (434345)  
40 3 and 8 and 39 (5777)

Database: CINAHL

| <b>Search ID#</b> | <b>Search Terms</b>                                                                                                                                                                                                                                                           | <b>Search Options</b>                                                                                                       | <b>Last Run Via</b>                                                                                    | <b>Results</b> |
|-------------------|-------------------------------------------------------------------------------------------------------------------------------------------------------------------------------------------------------------------------------------------------------------------------------|-----------------------------------------------------------------------------------------------------------------------------|--------------------------------------------------------------------------------------------------------|----------------|
| S59               | S3 AND S18 AND S58                                                                                                                                                                                                                                                            | Limiters - English Language; Publication Type: Clinical Trial, Randomized Controlled Trial<br>Search modes - Boolean/Phrase | Interface - EBSCOhost<br>Research Databases<br>Search Screen - Advanced<br>Search<br>Database - CINAHL | 1,295          |
| S58               | S19 or S20 or S21 or S22 or S23 or S24 or S25 or S26 or S27 or S28 or S29 or S30 or S31 or S32 or S33 or S34 or S35 or S36 or S37 or S38 or S39 or S40 or S41 or S42 or S43 or S44 or S45 or S46 or S47 or S48 or S49 or S50 or S51 or S52 or S53 or S54 or S55 or S56 or S57 | Search modes - Boolean/Phrase                                                                                               | Interface - EBSCOhost<br>Research Databases<br>Search Screen - Advanced<br>Search<br>Database - CINAHL | 1,355,505      |
| S57               | TX appraisal                                                                                                                                                                                                                                                                  | Search modes - Boolean/Phrase                                                                                               | Interface - EBSCOhost<br>Research Databases<br>Search Screen - Advanced<br>Search<br>Database - CINAHL | 21,298         |
| S56               | TX (preparedness or prepared)                                                                                                                                                                                                                                                 | Search modes - Boolean/Phrase                                                                                               | Interface - EBSCOhost<br>Research Databases<br>Search Screen - Advanced<br>Search<br>Database - CINAHL | 38,952         |
| S55               | TX mastery                                                                                                                                                                                                                                                                    | Search modes - Boolean/Phrase                                                                                               | Interface - EBSCOhost<br>Research Databases<br>Search Screen - Advanced                                | 3,746          |

|     |                              |                               |                                                                                                     |         |
|-----|------------------------------|-------------------------------|-----------------------------------------------------------------------------------------------------|---------|
|     |                              |                               | Search Database - CINAHL                                                                            |         |
| S54 | (MH "Empowerment")           | Search modes - Boolean/Phrase | Interface - EBSCOhost<br>Research Databases<br>Search Screen - Advanced<br>Search Database - CINAHL | 11,430  |
| S53 | TX (confidence or confident) | Search modes - Boolean/Phrase | Interface - EBSCOhost<br>Research Databases<br>Search Screen - Advanced<br>Search Database - CINAHL | 311,999 |
| S52 | (MH "Confidence")            | Search modes - Boolean/Phrase | Interface - EBSCOhost<br>Research Databases<br>Search Screen - Advanced<br>Search Database - CINAHL | 7,847   |
| S51 | TX self concept              | Search modes - Boolean/Phrase | Interface - EBSCOhost<br>Research Databases<br>Search Screen - Advanced<br>Search Database - CINAHL | 28,586  |
| S50 | (MH "Self Concept+")         | Search modes - Boolean/Phrase | Interface - EBSCOhost<br>Research Databases<br>Search Screen - Advanced<br>Search Database - CINAHL | 56,444  |
| S49 | TX self efficacy             | Search modes - Boolean/Phrase | Interface - EBSCOhost<br>Research Databases<br>Search Screen - Advanced                             | 26,104  |

|     |                                   |                               |                                                                                                     |         |
|-----|-----------------------------------|-------------------------------|-----------------------------------------------------------------------------------------------------|---------|
|     |                                   |                               | Search Database - CINAHL                                                                            |         |
| S48 | (MH "Self-Efficacy")              | Search modes - Boolean/Phrase | Interface - EBSCOhost<br>Research Databases<br>Search Screen - Advanced<br>Search Database - CINAHL | 18,216  |
| S47 | TX stress                         | Search modes - Boolean/Phrase | Interface - EBSCOhost<br>Research Databases<br>Search Screen - Advanced<br>Search Database - CINAHL | 185,153 |
| S46 | (MH "Adaptation, Psychological+") | Search modes - Boolean/Phrase | Interface - EBSCOhost<br>Research Databases<br>Search Screen - Advanced<br>Search Database - CINAHL | 29,626  |
| S45 | (MH "Stress, Psychological+")     | Search modes - Boolean/Phrase | Interface - EBSCOhost<br>Research Databases<br>Search Screen - Advanced<br>Search Database - CINAHL | 71,349  |
| S44 | (MH "Stress+")                    | Search modes - Boolean/Phrase | Interface - EBSCOhost<br>Research Databases<br>Search Screen - Advanced<br>Search Database - CINAHL | 82,729  |
| S43 | TX (grief* or griev*)             | Search modes - Boolean/Phrase | Interface - EBSCOhost<br>Research Databases<br>Search Screen - Advanced                             | 12,511  |



|     |                              |                               |                                                                                                     |        |
|-----|------------------------------|-------------------------------|-----------------------------------------------------------------------------------------------------|--------|
|     |                              |                               | Search Database - CINAHL                                                                            |        |
| S42 | (MH "Anticipatory Grieving") | Search modes - Boolean/Phrase | Interface - EBSCOhost<br>Research Databases<br>Search Screen - Advanced<br>Search Database - CINAHL | 138    |
| S41 | (MH "Grief+")                | Search modes - Boolean/Phrase | Interface - EBSCOhost<br>Research Databases<br>Search Screen - Advanced<br>Search Database - CINAHL | 7,152  |
| S40 | TX bereavement               | Search modes - Boolean/Phrase | Interface - EBSCOhost<br>Research Databases<br>Search Screen - Advanced<br>Search Database - CINAHL | 8,395  |
| S39 | (MH "Bereavement+")          | Search modes - Boolean/Phrase | Interface - EBSCOhost<br>Research Databases<br>Search Screen - Advanced<br>Search Database - CINAHL | 12,290 |
| S38 | TX burden                    | Search modes - Boolean/Phrase | Interface - EBSCOhost<br>Research Databases<br>Search Screen - Advanced<br>Search Database - CINAHL | 67,401 |
| S37 | (MH "Caregiver Burden")      | Search modes - Boolean/Phrase | Interface - EBSCOhost<br>Research Databases<br>Search Screen - Advanced                             | 8,594  |

|     |                              |                               |                                                                                                     |        |
|-----|------------------------------|-------------------------------|-----------------------------------------------------------------------------------------------------|--------|
|     |                              |                               | Search Database - CINAHL                                                                            |        |
| S36 | TX (cope* or coping)         | Search modes - Boolean/Phrase | Interface - EBSCOhost<br>Research Databases<br>Search Screen - Advanced<br>Search Database - CINAHL | 84,689 |
| S35 | (MH "Family Coping")         | Search modes - Boolean/Phrase | Interface - EBSCOhost<br>Research Databases<br>Search Screen - Advanced<br>Search Database - CINAHL | 1,926  |
| S34 | (MH "Coping+")               | Search modes - Boolean/Phrase | Interface - EBSCOhost<br>Research Databases<br>Search Screen - Advanced<br>Search Database - CINAHL | 31,337 |
| S33 | TX distress                  | Search modes - Boolean/Phrase | Interface - EBSCOhost<br>Research Databases<br>Search Screen - Advanced<br>Search Database - CINAHL | 48,317 |
| S32 | (MH "Family Distress Index") | Search modes - Boolean/Phrase | Interface - EBSCOhost<br>Research Databases<br>Search Screen - Advanced<br>Search Database - CINAHL | 2      |
| S31 | TX anxiety                   | Search modes - Boolean/Phrase | Interface - EBSCOhost<br>Research Databases<br>Search Screen - Advanced                             | 89,671 |

|     |                                            |                               |                                                                                                     |         |
|-----|--------------------------------------------|-------------------------------|-----------------------------------------------------------------------------------------------------|---------|
|     |                                            |                               | Search Database - CINAHL                                                                            |         |
| S30 | (MH "Anticipatory Anxiety")                | Search modes - Boolean/Phrase | Interface - EBSCOhost<br>Research Databases<br>Search Screen - Advanced<br>Search Database - CINAHL | 434     |
| S29 | (MH "Anxiety Disorders+")                  | Search modes - Boolean/Phrase | Interface - EBSCOhost<br>Research Databases<br>Search Screen - Advanced<br>Search Database - CINAHL | 39,029  |
| S28 | (MH "Anxiety+")                            | Search modes - Boolean/Phrase | Interface - EBSCOhost<br>Research Databases<br>Search Screen - Advanced<br>Search Database - CINAHL | 37,895  |
| S27 | TX (depression or depressive or affective) | Search modes - Boolean/Phrase | Interface - EBSCOhost<br>Research Databases<br>Search Screen - Advanced<br>Search Database - CINAHL | 177,882 |
| S26 | (MH "Depression+")                         | Search modes - Boolean/Phrase | Interface - EBSCOhost<br>Research Databases<br>Search Screen - Advanced<br>Search Database - CINAHL | 96,634  |
| S25 | TX mental health                           | Search modes - Boolean/Phrase | Interface - EBSCOhost<br>Research Databases<br>Search Screen - Advanced                             | 188,811 |

|     |                                          |                               |                                                                                                     |         |
|-----|------------------------------------------|-------------------------------|-----------------------------------------------------------------------------------------------------|---------|
|     |                                          |                               | Search Database - CINAHL                                                                            |         |
| S24 | (MH "Mental Disorders+")                 | Search modes - Boolean/Phrase | Interface - EBSCOhost<br>Research Databases<br>Search Screen - Advanced<br>Search Database - CINAHL | 488,177 |
| S23 | (MH "Mental Health Services+")           | Search modes - Boolean/Phrase | Interface - EBSCOhost<br>Research Databases<br>Search Screen - Advanced<br>Search Database - CINAHL | 68,823  |
| S22 | (MH "Mental Health")                     | Search modes - Boolean/Phrase | Interface - EBSCOhost<br>Research Databases<br>Search Screen - Advanced<br>Search Database - CINAHL | 29,376  |
| S21 | TX (quality of life or quality of lives) | Search modes - Boolean/Phrase | Interface - EBSCOhost<br>Research Databases<br>Search Screen - Advanced<br>Search Database - CINAHL | 152,851 |
| S20 | (MH "Quality of Life (Iowa NOC)")        | Search modes - Boolean/Phrase | Interface - EBSCOhost<br>Research Databases<br>Search Screen - Advanced<br>Search Database - CINAHL | 3       |
| S19 | (MH "Quality of Life+")                  | Search modes - Boolean/Phrase | Interface - EBSCOhost<br>Research Databases<br>Search Screen - Advanced                             | 100,947 |

|     |                                                                                                                                                                                                                                           |                               |                                                                                                  |         |
|-----|-------------------------------------------------------------------------------------------------------------------------------------------------------------------------------------------------------------------------------------------|-------------------------------|--------------------------------------------------------------------------------------------------|---------|
|     |                                                                                                                                                                                                                                           |                               | Search Database - CINAHL                                                                         |         |
| S18 | S4 or S5 or S6 or S7 or S8 or S9 or S10 or S11 or S12 or S13 or S14 or S15 or S16 or S17                                                                                                                                                  | Search modes - Boolean/Phrase | Interface - EBSCOhost<br>Research Databases<br>Search Screen - Advanced Search Database - CINAHL | Display |
| S17 | TX (caregiver* or "care giver*" or carer* or spouse* or husband* or wife or wives or sibling* or brother* or sister* or partner* or parent* or family or clerg* or supportive care or ((people or individual*) N1 "caring for patient*")) | Search modes - Boolean/Phrase | Interface - EBSCOhost<br>Research Databases<br>Search Screen - Advanced Search Database - CINAHL | Display |
| S16 | (MH "Spouses")                                                                                                                                                                                                                            | Search modes - Boolean/Phrase | Interface - EBSCOhost<br>Research Databases<br>Search Screen - Advanced Search Database - CINAHL | Display |
| S15 | (MH "Family+")                                                                                                                                                                                                                            | Search modes - Boolean/Phrase | Interface - EBSCOhost<br>Research Databases<br>Search Screen - Advanced Search Database - CINAHL | Display |
| S14 | (MH "Caregiver Physical Health (Iowa NOC)")                                                                                                                                                                                               | Search modes - Boolean/Phrase | Interface - EBSCOhost<br>Research Databases<br>Search Screen - Advanced Search Database - CINAHL | Display |

|     |                                                  |                               |                                                                                                        |         |
|-----|--------------------------------------------------|-------------------------------|--------------------------------------------------------------------------------------------------------|---------|
| S13 | (MH "Caregiver Role Strain (NANDA)")             | Search modes - Boolean/Phrase | Interface - EBSCOhost<br>Research Databases<br>Search Screen - Advanced<br>Search<br>Database - CINAHL | Display |
| S12 | (MH "Caregiver Strain Index")                    | Search modes - Boolean/Phrase | Interface - EBSCOhost<br>Research Databases<br>Search Screen - Advanced<br>Search<br>Database - CINAHL | Display |
| S11 | (MH "Caregiver Well-Being (Iowa NOC)")           | Search modes - Boolean/Phrase | Interface - EBSCOhost<br>Research Databases<br>Search Screen - Advanced<br>Search<br>Database - CINAHL | Display |
| S10 | (MH "Caregiver-Patient Relationship (Iowa NOC)") | Search modes - Boolean/Phrase | Interface - EBSCOhost<br>Research Databases<br>Search Screen - Advanced<br>Search<br>Database - CINAHL | Display |
| S9  | (MH "Caregiver Stressors (Iowa NOC)")            | Search modes - Boolean/Phrase | Interface - EBSCOhost<br>Research Databases<br>Search Screen - Advanced<br>Search<br>Database - CINAHL | Display |
| S8  | (MH "Caregiver Support")                         | Search modes - Boolean/Phrase | Interface - EBSCOhost<br>Research Databases<br>Search Screen - Advanced<br>Search<br>Database - CINAHL | Display |

|    |                                                          |                               |                                                                                                        |         |
|----|----------------------------------------------------------|-------------------------------|--------------------------------------------------------------------------------------------------------|---------|
| S7 | (MH "Caregivers")                                        | Search modes - Boolean/Phrase | Interface - EBSCOhost<br>Research Databases<br>Search Screen - Advanced<br>Search<br>Database - CINAHL | Display |
| S6 | (MH "Caregiver Attitudes")                               | Search modes - Boolean/Phrase | Interface - EBSCOhost<br>Research Databases<br>Search Screen - Advanced<br>Search<br>Database - CINAHL | Display |
| S5 | (MH "Caregiver Burden")                                  | Search modes - Boolean/Phrase | Interface - EBSCOhost<br>Research Databases<br>Search Screen - Advanced<br>Search<br>Database - CINAHL | Display |
| S4 | (MH "Family Caregiver Status (Iowa NOC)+")               | Search modes - Boolean/Phrase | Interface - EBSCOhost<br>Research Databases<br>Search Screen - Advanced<br>Search<br>Database - CINAHL | Display |
| S3 | S1 OR S2                                                 | Search modes - Boolean/Phrase | Interface - EBSCOhost<br>Research Databases<br>Search Screen - Advanced<br>Search<br>Database - CINAHL | Display |
| S2 | TX (cancer or neoplasm* or carcinoma or tumor or tumour) | Search modes - Boolean/Phrase | Interface - EBSCOhost<br>Research Databases<br>Search Screen - Advanced<br>Search<br>Database - CINAHL | Display |

|    |                   |                               |                                                                                                        |         |
|----|-------------------|-------------------------------|--------------------------------------------------------------------------------------------------------|---------|
| S1 | (MH "Neoplasms+") | Search modes - Boolean/Phrase | Interface - EBSCOhost<br>Research Databases<br>Search Screen - Advanced<br>Search<br>Database - CINAHL | Display |
|----|-------------------|-------------------------------|--------------------------------------------------------------------------------------------------------|---------|



## Supplementary Methods 2. Study Inclusion and Exclusion Criteria

| Inclusion Criteria                                                                                                                                                                                                                                                                                                                                                                                                                                                                                                                                                                                                                                                                                                                                                                                                                                                                                                                                                                | Exclusion Criteria                                                                                                                                                                                                                                                                                                                                                                                                                                                                                       |
|-----------------------------------------------------------------------------------------------------------------------------------------------------------------------------------------------------------------------------------------------------------------------------------------------------------------------------------------------------------------------------------------------------------------------------------------------------------------------------------------------------------------------------------------------------------------------------------------------------------------------------------------------------------------------------------------------------------------------------------------------------------------------------------------------------------------------------------------------------------------------------------------------------------------------------------------------------------------------------------|----------------------------------------------------------------------------------------------------------------------------------------------------------------------------------------------------------------------------------------------------------------------------------------------------------------------------------------------------------------------------------------------------------------------------------------------------------------------------------------------------------|
| <p>Sample:</p> <ul style="list-style-type: none"> <li>- Adult caregivers (<math>\geq 18</math> years old) of adult patients (<math>\geq 18</math> years old)</li> <li>- All patients have advanced cancer (Stage 3 or 4 solid tumour diagnosis, or diagnosis of a hematologic malignancy where the 5-year survival is less than 50%)</li> </ul> <p>Intervention:</p> <ul style="list-style-type: none"> <li>- Psycho-educational, skills training, counseling or team-based interventions to offer direct or indirect support with caregiving or coping</li> </ul> <p>Outcomes:</p> <ul style="list-style-type: none"> <li>- Quality of life, depression, anxiety, general mental health, general physical health, caregiving outcomes (e.g. burden, self-efficacy, confidence, and preparedness for the caregiving role), and bereavement outcomes (e.g. grief)</li> </ul> <p>Study Design:</p> <ul style="list-style-type: none"> <li>- Randomized controlled trials</li> </ul> | <p>Sample:</p> <ul style="list-style-type: none"> <li>- Some patients with early-stage cancer, or non-cancer diagnosis</li> </ul> <p>Intervention:</p> <ul style="list-style-type: none"> <li>- Complementary therapies (e.g. massage)</li> <li>- Interventions specifically targeted at one symptom (e.g. insomnia)</li> </ul> <p>Study Design:</p> <ul style="list-style-type: none"> <li>- Non-randomized trial designs</li> <li>- Trials with total <math>n &lt; 20</math> for caregivers</li> </ul> |

### **Supplementary Methods 3. Methodological Details Regarding Risk of Bias Assessment**

All studies were assessed for their risk of bias using the Cochrane Collaboration's Risk of Bias tool version 2. This tool contains five domains: risk of bias arising from the randomization process; due to deviations from the intended interventions; due to missing outcome data; from measurement of the outcome; or in selection of the reported result. Judgement about the overall risk of bias arising from the five domains was made using the published algorithm based on answers to the signalling questions within the tool. Within each domain, the risk of bias was assessed by two independent reviewers. Judgements could be 'Low', 'High' or 'Some Concerns' risk of bias.

As it is impractical and unethical to blind study participants in behavioral interventions such as caregiver interventions, we made the following modifications to the risk of bias assessment.<sup>24,35</sup>

1. For domain 1, allocation sequences were only considered concealed if a statement was explicitly made regarding concealment or if a computer-generated sequence was used for randomization.
2. For domain 2, we omitted item 2.3 (“Were there deviations from the intended intervention that arose because of the trial context?”) from the assessment of domain 2, as all subjects were at risk to receive unintended co-interventions regardless of whether it was reported or not;
3. For domain 4, items 4.3 (“Were outcome assessors aware of the intervention received by study participants?”), 4.4 (“Could assessment of the outcome have been influenced by knowledge of intervention received?”) and 4.5 (“Is it likely that assessment of the outcome was influenced by knowledge of intervention received?”) were omitted from final risk of bias judgements for all subjective outcomes as all studies were judged ‘High’ risk for this domain.

**Supplementary Table 1.** Study Characteristics, of Interventions Directed at Caregivers

| Trial (Country)                                         | Study Design                                          | Patient Population and Caregiver's Relationship to Patients                                                                                                  | Caregiver Outcomes Assessed (Instrument)                                                                | Intervention                                                                                                                             |    | Comparator                |    | Results                                                                                                                                                                                                                                                                                                                                                                                                                                                                                                                                                                                                                                                                                                                                                                                                                                                                                                                                                                                                                                                                                                                                                                                                                                                                                                                                                                                                                                                                                                                                                                                                                                           |
|---------------------------------------------------------|-------------------------------------------------------|--------------------------------------------------------------------------------------------------------------------------------------------------------------|---------------------------------------------------------------------------------------------------------|------------------------------------------------------------------------------------------------------------------------------------------|----|---------------------------|----|---------------------------------------------------------------------------------------------------------------------------------------------------------------------------------------------------------------------------------------------------------------------------------------------------------------------------------------------------------------------------------------------------------------------------------------------------------------------------------------------------------------------------------------------------------------------------------------------------------------------------------------------------------------------------------------------------------------------------------------------------------------------------------------------------------------------------------------------------------------------------------------------------------------------------------------------------------------------------------------------------------------------------------------------------------------------------------------------------------------------------------------------------------------------------------------------------------------------------------------------------------------------------------------------------------------------------------------------------------------------------------------------------------------------------------------------------------------------------------------------------------------------------------------------------------------------------------------------------------------------------------------------------|
|                                                         |                                                       |                                                                                                                                                              |                                                                                                         | Description                                                                                                                              | n  | Description               | n  |                                                                                                                                                                                                                                                                                                                                                                                                                                                                                                                                                                                                                                                                                                                                                                                                                                                                                                                                                                                                                                                                                                                                                                                                                                                                                                                                                                                                                                                                                                                                                                                                                                                   |
| <b>Arias-Rojas et al, 2020 (Colombia)</b> <sup>41</sup> | Single-site, individually-randomized controlled trial | <p>Patients: stage IV cancer. Setting = inpatient. Mean age = 57.2 years.</p> <p>Caregivers: family caregivers. Mean age = 43.7. Percentage female = 76%</p> | Intervention satisfaction (31-item scale), uncertainty (26-item scale), quality of life (37-item scale) | Face-to-face nursing intervention, with educational booklet, individualized one-hour educational meeting and interactive web application | 38 | Group educational session | 42 | <p>Uncertainty, total uncertainty, baseline to 5-7 days post intervention: <math>\Delta=-5.90</math> vs <math>\Delta=-2.26</math> (<math>p=0.01</math>)</p> <p>Uncertainty, inconsistency, baseline to 5-7 days post intervention: <math>\Delta=-2.76</math> vs <math>\Delta=-1.24</math> (<math>p=0.04</math>)</p> <p>Uncertainty, unpredictability, baseline to 5-7 days post intervention: <math>\Delta=-0.37</math> vs <math>\Delta=-0.26</math> (<math>p&gt;0.05</math>)</p> <p>Uncertainty, ambiguity, baseline to 5-7 days post intervention: <math>\Delta=-0.87</math> vs <math>\Delta=-0.57</math> (<math>p&gt;0.05</math>)</p> <p>Uncertainty, complexity, baseline to 5-7 days post intervention: <math>\Delta=-2.27</math> vs <math>\Delta=-0.26</math> (<math>p=0.03</math>)</p> <p>Quality of life, total quality of life, baseline to 5-7 days post intervention: <math>\Delta=2.45</math> vs <math>\Delta=4.17</math> (<math>p&gt;0.05</math>)</p> <p>Quality of life, physical well-being, baseline to 5-7 days post intervention: <math>\Delta=1.48</math> vs <math>\Delta=0.00</math> (<math>p&gt;0.05</math>)</p> <p>Quality of life, psychological well-being, baseline to 5-7 days post intervention: <math>\Delta=-8.16</math> vs <math>\Delta=-9.55</math> (<math>p=0.01</math>)</p> <p>Quality of life, social concerns, baseline to 5-7 days post intervention: <math>\Delta=-1.11</math> vs <math>\Delta=1.69</math> (<math>p&gt;0.05</math>)</p> <p>Quality of life, spiritual well-being, baseline to 5-7 days post intervention: <math>\Delta=-0.44</math> vs <math>\Delta=1.88</math> (<math>p&gt;0.05</math>)</p> |

| Trial (Country)                                      | Study Design                                          | Patient Population and Caregiver's Relationship to Patients                                                                                                                                                                                                                         | Caregiver Outcomes Assessed (Instrument)                                                                                                      | Intervention                                                                                                                                             |    | Comparator    |    | Results                                                                                                                                                                                                                                                                                                                                      |
|------------------------------------------------------|-------------------------------------------------------|-------------------------------------------------------------------------------------------------------------------------------------------------------------------------------------------------------------------------------------------------------------------------------------|-----------------------------------------------------------------------------------------------------------------------------------------------|----------------------------------------------------------------------------------------------------------------------------------------------------------|----|---------------|----|----------------------------------------------------------------------------------------------------------------------------------------------------------------------------------------------------------------------------------------------------------------------------------------------------------------------------------------------|
|                                                      |                                                       |                                                                                                                                                                                                                                                                                     |                                                                                                                                               | Description                                                                                                                                              | n  | Description   | n  |                                                                                                                                                                                                                                                                                                                                              |
| <b>Aubin et al, 2021 (Canada)</b> <sup>42</sup>      | Single-site, individually-randomized controlled trial | Patients: Nonsurgical lung cancer. Setting = outpatient<br><br>Caregivers: family caregiver. Mean age = 61.8 years. Percentage female = 72%                                                                                                                                         | Anxiety (HADS), caregiver preparedness (CPS), depression (HADS), distress (HADS), psychological burden (CBSEOLC), quality of life (COHQOLFCG) | Distress screening and problem assessment every 2 months, and contact with oncology nurse to review results and plan tailored problem-solving strategies | 55 | Usual care    | 54 | Anxiety over time: $p=0.97$<br><br>Caregiver preparedness over time: $p=0.61$<br><br>Depression over time: $p=0.86$<br><br>Distress over time: $p=0.90$<br><br>Psychological burden over time: $p=0.60$<br><br>Quality of life over time: $p=0.82$                                                                                           |
| <b>Boele et al, 2013 (Netherlands)</b> <sup>43</sup> | Multi-site, individually-randomized controlled trial  | Patients: grade III or IV high-grade gliomas. Setting = outpatient. Mean age = 52.7 years. Percentage female = 34%<br><br>Caregivers: informal caregiver, such as spouse or significant other providing > 21 hours of care per week. Mean age = 50.7 years. Percentage female = 64% | Caregiver mastery (CMS), quality of life (SF36)                                                                                               | Protocolized psychoeducational sessions of psychologist with caregiver, every other week for maximum of 6 one-hour sessions                              | 31 | Standard care | 25 | Caregiver mastery, 0 to 10 months: $\beta=-0.369$ ( $p=0.01$ )<br><br>Quality of life, mental functioning, 0 to 10 months: $\beta=0.271$ ( $p=0.05$ )                                                                                                                                                                                        |
| <b>El-Jawahri et al, 2020 (USA)</b> <sup>44</sup>    | Single-site, individually-randomized controlled trial | Patients: autologous or allogeneic hematopoietic stem cell transplantation. Setting = outpatient<br><br>Caregiver: relative or friend who lived with patient or had in-person contact with patient at least twice per week, and identified by patient as                            | Anxiety (HADS), burden (CRA), coping skills (MOCS), depression (HADS), self-efficacy (CASE-T),                                                | 4 weekly and 2 semimonthly caregiver-directed coping skills intervention                                                                                 | 45 | Usual care    | 47 | Anxiety, 0 to 2 months: $d=0.96$ ( $p<0.01$ )<br><br>Burden, 0 to 2 months: $d=0.73$ ( $p<0.01$ )<br><br>Coping skills, 0 to 2 months: $d=0.98$ ( $p<0.01$ )<br><br>Depression, 0 to 2 months: $d=0.57$ ( $p=0.01$ )<br><br>Self-efficacy, 0 to 2 months: $d=0.51$ ( $p=0.02$ )<br><br>Quality of life, 0 to 2 months: $d=0.68$ ( $p<0.01$ ) |

| Trial (Country)                                            | Study Design                                          | Patient Population and Caregiver's Relationship to Patients                                                                                                                                                                                                               | Caregiver Outcomes Assessed (Instrument)                                       | Intervention                                                                                                                                                                        |     | Comparator  |     | Results                                                                                                                                                                                                                                                                                                                                                                                                                                                                                                                                                                                                                                                                                                                                                                                                                                                                                                 |
|------------------------------------------------------------|-------------------------------------------------------|---------------------------------------------------------------------------------------------------------------------------------------------------------------------------------------------------------------------------------------------------------------------------|--------------------------------------------------------------------------------|-------------------------------------------------------------------------------------------------------------------------------------------------------------------------------------|-----|-------------|-----|---------------------------------------------------------------------------------------------------------------------------------------------------------------------------------------------------------------------------------------------------------------------------------------------------------------------------------------------------------------------------------------------------------------------------------------------------------------------------------------------------------------------------------------------------------------------------------------------------------------------------------------------------------------------------------------------------------------------------------------------------------------------------------------------------------------------------------------------------------------------------------------------------------|
|                                                            |                                                       |                                                                                                                                                                                                                                                                           |                                                                                | Description                                                                                                                                                                         | n   | Description | n   |                                                                                                                                                                                                                                                                                                                                                                                                                                                                                                                                                                                                                                                                                                                                                                                                                                                                                                         |
|                                                            |                                                       | primary caregiver.<br>Median age = 61 years.<br>Percentage female = 70%                                                                                                                                                                                                   | quality of life (CarGOQOL)                                                     |                                                                                                                                                                                     |     |             |     |                                                                                                                                                                                                                                                                                                                                                                                                                                                                                                                                                                                                                                                                                                                                                                                                                                                                                                         |
| <b>Ferrell <i>et al</i>, 2019 (USA)</b> <sup>45</sup>      | Single-site, individually-randomized controlled trial | <p>Patients: stage III or IV gastrointestinal, gynecologic or genitourinary cancers. Setting = outpatient</p> <p>Caregivers: family caregiver who self-identified as being financially strained by illness or treatment. Mean age = 55 years. Percentage female = 81%</p> | Burden (CBS), distress (PDT), preparedness (CPS), quality of life (COHQOLFC G) | Four caregiver education teaching sessions delivered in-person or by phone by an advanced practice oncology nurse and a personalized self-care plan to promote caregiver well-being | 117 | Usual care  | 123 | <p>Burden, overall burden, 0 to 1 month: F=0.90 (<math>p=0.34</math>)</p> <p>Burden, objective burden, 0 to 1 month: F=3.66 (<math>p=0.05</math>)</p> <p>Burden, subjective stress burden, 0 to 1 month: F=0.27 (<math>p=0.60</math>)</p> <p>Burden, subjective demand burden, 0 to 1 month: F=0.04 (<math>p=0.83</math>)</p> <p>Distress, 0 to 1 month: F=0.53 (<math>p=0.47</math>)</p> <p>Preparedness, 0 to 1 month: F=4.54 (<math>p=0.03</math>)</p> <p>Quality of life, overall, 0 to 1 month: F=5.97 (<math>p=0.01</math>)</p> <p>Quality of life, physical well-being, 0 to 1 month: F=1.58 (<math>p=0.21</math>)</p> <p>Quality of life, psychological well-being, 0 to 1 month: F=6.21 (<math>p=0.01</math>)</p> <p>Quality of life, social concerns, 0 to 1 month: F=1.61 (<math>p=0.20</math>)</p> <p>Quality of life, spiritual well-being, 0 to 1 month: F=4.96 (<math>p=0.02</math>)</p> |
| <b>Hudson <i>et al</i>, 2005 (Australia)</b> <sup>46</sup> | Multi-site, individually-randomized controlled trial  | Patients: advanced cancer. Setting = home. Mean age = 69.1 years. Percentage female = 54%.                                                                                                                                                                                | Anxiety (HADS), competence (CCS), depression (HADS),                           | Two educational home visits supplemented by a follow-up phone call between the two visits.                                                                                          | 54  | Usual care  | 52  | <p>Anxiety, at 5 weeks: 7.76 vs 8.06</p> <p>Anxiety, at 8 weeks: 6.96 vs 6.76</p> <p>Competence, at 5 weeks: 2.37 vs 2.40</p>                                                                                                                                                                                                                                                                                                                                                                                                                                                                                                                                                                                                                                                                                                                                                                           |

| Trial (Country)                                                                                                          | Study Design                                          | Patient Population and Caregiver's Relationship to Patients                                                                                                                                           | Caregiver Outcomes Assessed (Instrument)                                                                                | Intervention                                                                                                                                    |              | Comparator         |     | Results                                                                                                                                                                                                                                                                                                                                                                              |
|--------------------------------------------------------------------------------------------------------------------------|-------------------------------------------------------|-------------------------------------------------------------------------------------------------------------------------------------------------------------------------------------------------------|-------------------------------------------------------------------------------------------------------------------------|-------------------------------------------------------------------------------------------------------------------------------------------------|--------------|--------------------|-----|--------------------------------------------------------------------------------------------------------------------------------------------------------------------------------------------------------------------------------------------------------------------------------------------------------------------------------------------------------------------------------------|
|                                                                                                                          |                                                       |                                                                                                                                                                                                       |                                                                                                                         | Description                                                                                                                                     | n            | Description        | n   |                                                                                                                                                                                                                                                                                                                                                                                      |
|                                                                                                                          |                                                       | Caregivers: family caregiver identified by the patient. Mean age = 60.8 years. Percentage female = 65%                                                                                                | preparedness (PCS), rewards (RCS), self-efficacy (Zeiss Instrument)                                                     |                                                                                                                                                 |              |                    |     | Competence, at 8 weeks: 2.53 vs 2.47<br>Preparedness, at 5 weeks: 2.76 vs 2.67<br>Preparedness, at 8 weeks: 2.83 vs 2.59<br>Rewards, at 5 weeks: 3.09 vs 2.82<br>Rewards, at 8 weeks: 3.50 vs 3.04<br>Self-efficacy, problem solving, at 5 weeks: 7.37 vs 8.14<br>Self-efficacy, respite, at 5 weeks: 6.79 vs 6.23<br>Self-efficacy, rewarding interaction, at 5 weeks: 8.29 vs 8.22 |
| <b>Hudson <i>et al</i>, 2013 (Australia)</b> <sup>47</sup><br><b>Hudson <i>et al</i>, 2015 (Australia)</b> <sup>48</sup> | Multi-site, individually-randomized controlled trial  | Patients: advanced cancer, receiving home-based palliative care. Setting = home<br><br>Caregivers: family caregiver. Mean age = 59 years                                                              | Competence (CCS), family need, psychological distress (GHQ), preparedness (caregiving scale)                            | Three psychoeducational phone calls and one home visit in four weeks<br><br>Two psychoeducational phone calls and two home visits in four weeks | 57<br><br>93 | Usual care         | 148 | Competence, at 5 weeks: $\Delta=0.30$ ( $p=0.03$ )<br>Distress, at 5 weeks: $\Delta=0.15$ ( $p>0.18$ )<br>Distress, 8 weeks after death: $\Delta=0.36$ ( $p=0.05$ )<br>Family need, at 5 weeks: $\Delta=0.18$ ( $p>0.07$ )<br>Preparedness, at 5 weeks: $\Delta=0.22$ ( $p=0.08$ )                                                                                                   |
| <b>Laudenslager <i>et al</i>, 2015 (USA)</b> <sup>49</sup>                                                               | Single-site, individually-randomized controlled trial | Patients: allogeneic hematopoietic stem cell transplant. Setting = mixed. Mean age = 49.5 years. Percentage female = 32%<br><br>Caregivers: caregiver. Mean age = 53.5 years. Percentage female = 76% | Anxiety (STAI), burden (CRA), depression (CESD), physical health (SF36), mental health (SF36), stress (PSS), total mood | Eight 1-on-1 educational sessions on stress and coping with social worker                                                                       | 74           | Treatment as usual | 74  | Anxiety, over time: $F=6.21$ ( $p<0.01$ )<br>Burden, over time: $F=0.92$ ( $p=0.40$ )<br>Depression, over time: $F=3.66$ ( $p=0.03$ )<br>Physical health, over time: $F=0.17$<br>Mental health, over time: $F=0.29$<br>Total mood disturbance, over time: $F=4.62$ ( $p=0.01$ )                                                                                                      |

| Trial (Country)                                        | Study Design                                          | Patient Population and Caregiver's Relationship to Patients                                                                                             | Caregiver Outcomes Assessed (Instrument)                                                                                    | Intervention                                                                                                    |     | Comparator    |     | Results                                                                                                                                                                                                                                                                                                                                                                                                                                                                                                                                                                                                                                                                                                                                                                                          |
|--------------------------------------------------------|-------------------------------------------------------|---------------------------------------------------------------------------------------------------------------------------------------------------------|-----------------------------------------------------------------------------------------------------------------------------|-----------------------------------------------------------------------------------------------------------------|-----|---------------|-----|--------------------------------------------------------------------------------------------------------------------------------------------------------------------------------------------------------------------------------------------------------------------------------------------------------------------------------------------------------------------------------------------------------------------------------------------------------------------------------------------------------------------------------------------------------------------------------------------------------------------------------------------------------------------------------------------------------------------------------------------------------------------------------------------------|
|                                                        |                                                       |                                                                                                                                                         |                                                                                                                             | Description                                                                                                     | n   | Description   | n   |                                                                                                                                                                                                                                                                                                                                                                                                                                                                                                                                                                                                                                                                                                                                                                                                  |
|                                                        |                                                       |                                                                                                                                                         | disturbance (POMS-TMD), trauma (IES)                                                                                        |                                                                                                                 |     |               |     | Trauma, over time: $F=0.03$ ( $p=0.97$ )                                                                                                                                                                                                                                                                                                                                                                                                                                                                                                                                                                                                                                                                                                                                                         |
| <b>Leow <i>et al</i>, 2015 (USA)</b> <sup>50</sup>     | Multi-site, individually-randomized controlled trial  | <p>Patients: advanced cancer. Setting = mixed. Mean age = 69 years</p> <p>Caregivers: family member. Mean age = 47.2 years. Percentage female = 67%</p> | Closeness (GCS), depression (DASS), knowledge (six questions), social support (SSQ), stress (DASS), quality of life (CQOLC) | Caring for the Caregiver Programme: one-hour psychoeducational face-to-face sessions, two follow-up phone calls | 38  | Standard care | 42  | <p>Closeness, 0 to 8 weeks: <math>f=0.72</math> (<math>p=0.51</math>)</p> <p>Depression, 0 to 8 weeks: <math>f=0.72</math> (<math>p=0.43</math>)</p> <p>Knowledge, 0 to 8 weeks: <math>f=94.41</math> (<math>p&lt;0.01</math>)</p> <p>Social support (number), 0 to 8 weeks: <math>f=1.7</math> (<math>p=0.2</math>)</p> <p>Social support (satisfaction), 0 to 8 weeks: <math>f=0.13</math> (<math>p=0.83</math>)</p> <p>Stress, 0 to 8 weeks: <math>f=1.87</math> (<math>p=0.17</math>)</p> <p>Quality of life, 0 to 8 weeks: <math>f=4.83</math> (<math>p=0.01</math>)</p>                                                                                                                                                                                                                    |
| <b>McMillan <i>et al</i>, 2006 (USA)</b> <sup>51</sup> | Single-site, individually-randomized controlled trial | <p>Patients: advanced cancer, hospice-care. Setting = home. Mean age = 70 years</p> <p>Caregivers: Mean age = 60 years. Percentage female = 83%</p>     | Burden (MSAS), coping (BC) mastery (6-item scale), quality of life (CQOLC)                                                  | <p>Three supportive visits</p> <p>Three visits, to teach coping skills</p>                                      | 109 | Standard care | 109 | <p>Burden (symptom burden), 1 to 2 weeks after intervention: <math>\beta=-1.27</math> (<math>p=0.18</math>)</p> <p>Burden (caregiving task), 1 to 2 weeks after intervention: <math>\beta=-0.10</math> (<math>p=0.06</math>)</p> <p>Coping (problem-focused), 1 to 2 weeks after intervention: <math>\beta=0.05</math> (<math>p=0.87</math>)</p> <p>Coping (emotion-focused), 1 to 2 weeks after intervention: <math>\beta=0.14</math> (<math>p=0.69</math>)</p> <p>Mastery (general), 1 to 2 weeks after intervention: <math>\beta=0.33</math> (<math>p=0.09</math>)</p> <p>Mastery (caregiver task), 1 to 2 weeks after intervention: <math>\beta=0.03</math> (<math>p=0.51</math>)</p> <p>Quality of life, 1 to 2 week after intervention: <math>\beta=-2.03</math> (<math>p=0.16</math>)</p> |

| Trial (Country)                                              | Study Design                                         | Patient Population and Caregiver's Relationship to Patients                                                                                      | Caregiver Outcomes Assessed (Instrument)                                          | Intervention                                                                   |     | Comparator         |     | Results                                                                                                                                                                                                                                                                                                                                                                                                                                                                                                                                                                                                                                                                                                                                                                                                                                                                                                                                                                                                                                  |
|--------------------------------------------------------------|------------------------------------------------------|--------------------------------------------------------------------------------------------------------------------------------------------------|-----------------------------------------------------------------------------------|--------------------------------------------------------------------------------|-----|--------------------|-----|------------------------------------------------------------------------------------------------------------------------------------------------------------------------------------------------------------------------------------------------------------------------------------------------------------------------------------------------------------------------------------------------------------------------------------------------------------------------------------------------------------------------------------------------------------------------------------------------------------------------------------------------------------------------------------------------------------------------------------------------------------------------------------------------------------------------------------------------------------------------------------------------------------------------------------------------------------------------------------------------------------------------------------------|
|                                                              |                                                      |                                                                                                                                                  |                                                                                   | Description                                                                    | n   | Description        | n   |                                                                                                                                                                                                                                                                                                                                                                                                                                                                                                                                                                                                                                                                                                                                                                                                                                                                                                                                                                                                                                          |
| <b>Mitchell <i>et al</i>, 2013 (Australia)</b> <sup>52</sup> | Multi-site, individually-randomized controlled trial | Patients: locally invasive or metastatic cancer. Setting = mixed.<br><br>Caregivers: not defined. Mean age = 57.4 years. Percentage female = 56% | Anxiety (HADS), depression (HADS), unmet needs (SCNS-P&C), quality of life (SF12) | Carer-practitioner consultations directed by self-completed checklist of needs | 194 | Usual care         | 198 | Anxiety, at 1 month: $d=0.05$ ( $p=0.886$ )<br><br>Anxiety, at 3 months: $d = 0.33$ ( $p=0.437$ )<br><br>Anxiety, at 6 months: $d=0.82$ ( $p=0.109$ )<br><br>Depression, at 1 month: $d=0.22$ ( $p=0.473$ )<br><br>Depression, at 3 months: $d=0.21$ ( $p=0.624$ )<br><br>Depression, at 6 months: $d=0.73$ ( $p=0.154$ )<br><br>Total number of unmet needs, at 1 month: $d=0.18$ ( $p=0.772$ )<br><br>Total number of unmet needs, at 3 months: $d=0.49$ ( $p=0.441$ )<br><br>Total number of unmet needs, at 6 months: $d=0.16$ ( $p=0.841$ )<br><br>Quality of life, physical component, at 1 month: $d=0.61$ ( $p=0.482$ )<br><br>Quality of life, physical component, at 3 months: $d=0.85$ ( $p=0.362$ )<br><br>Quality of life, physical component, at 6 months: $d=0.14$ ( $p=0.902$ )<br><br>Quality of life, mental component, at 1 month: $d=0.45$ ( $p=0.662$ )<br><br>Quality of life, mental component, at 3 months: $d=1.49$ ( $p=0.178$ )<br><br>Quality of life, mental component, at 6 months: $d=0.13$ ( $p=0.924$ ) |
| <b>Pensak <i>et al</i>, 2020 (USA)</b> <sup>53</sup>         | Single-site, individually-                           | Patients: advanced cancer. Setting = outpatient                                                                                                  | Ability (MOCS), anxiety                                                           | 12-week self-administered educational                                          | 26  | Treatment as usual | 30  | Ability, over time: $F=6.16$ ( $p=0.02$ )<br><br>Anxiety, over time: $F=0.27$ ( $p=0.61$ )                                                                                                                                                                                                                                                                                                                                                                                                                                                                                                                                                                                                                                                                                                                                                                                                                                                                                                                                               |



| Trial (Country)                                         | Study Design                                          | Patient Population and Caregiver's Relationship to Patients                                                                                                                          | Caregiver Outcomes Assessed (Instrument)                                                          | Intervention                                                                                |     | Comparator                     |     | Results                                                                                                                                                                                                                                                                                                                               |
|---------------------------------------------------------|-------------------------------------------------------|--------------------------------------------------------------------------------------------------------------------------------------------------------------------------------------|---------------------------------------------------------------------------------------------------|---------------------------------------------------------------------------------------------|-----|--------------------------------|-----|---------------------------------------------------------------------------------------------------------------------------------------------------------------------------------------------------------------------------------------------------------------------------------------------------------------------------------------|
|                                                         |                                                       |                                                                                                                                                                                      |                                                                                                   | Description                                                                                 | n   | Description                    | n   |                                                                                                                                                                                                                                                                                                                                       |
|                                                         | randomized controlled trial                           | Caregivers: primary caregiver. Mean age = 54.3 years. Percentage female = 75%                                                                                                        | (HADS), depression (CESD), female sexual function (FSFI), male sexual health (MSHQ), stress (PSS) | intervention, of 10 prerecorded sessions of less than 20 minutes                            |     |                                |     | Depression, over time: $F=0.10$ ( $p=0.75$ )<br>Female sexual function, over time: $F=5.07$ ( $p=0.03$ )<br>Male sexual health, over time: $F=1.06$ ( $p=0.33$ )<br>Stress, over time: $F=3.91$ ( $p=0.05$ )                                                                                                                          |
| <b>Walsh et al, 2007 (United Kingdom)</b> <sup>54</sup> | Multi-site, individually-randomized controlled trial  | Patients: advanced cancer, receiving specialist palliative care. Setting = outpatient<br><br>Caregivers: identified by patient. Mean age = 56.3 years. Percentage female = 79%       | Bereavement (CBereavementI), strain (CSI), quality of life (CQOLC)                                | Six visits with community nursing and social work over 6 weeks                              | 137 | Specialist palliative care     | 134 | Bereavement, 4 months after death: $t=0.91$ ( $p=0.37$ )<br><br>Strain, at 4 weeks: 27.7 vs 27.8<br><br>Strain, at 9 weeks: 26.7 vs 25.1<br><br>Strain, at 12 weeks: 27.2 vs 27.3<br><br>Quality of life, at 4 weeks: 72.8 vs 66.4<br><br>Quality of life, at 9 weeks: 69.6 vs 63.9<br><br>Quality of life, at 12 weeks: 65.2 vs 62.2 |
| <b>Washington et al, 2018 (USA)</b> <sup>55</sup>       | Single-site, individually-randomized controlled trial | Patient: palliative cancer. Setting = outpatient. Mean age = 60.4 years. Percentage female = 53%<br><br>Caregivers: family caregiver. Mean age = 51.5 years. Percentage female = 69% | Anxiety (GAD-7), depression (PHQ-9), quality of life (CQLI-R)                                     | Three problem-solving intervention sessions, each 1 week apart                              | 42  | Usual care                     | 41  | Anxiety: $\beta=-2.76$ vs 16.36<br><br>Depression: $\beta=-2.68$ vs 12.80<br><br>Quality of life: $\beta=2.77$ vs -5.29                                                                                                                                                                                                               |
| <b>Younis et al, 2019 (Jordan)</b> <sup>56</sup>        | Single-site, individually-randomized controlled trial | Patient: cancers receiving palliative care. Setting = outpatient<br><br>Caregivers: non-professional caregiver                                                                       | Quality of life (QOLLTI-F)                                                                        | Formal teaching in structured environment, and home visits to provide teaching and training | 47  | Control group, no intervention | 45  | Quality of life: $d=13.62$ ( $p<0.001$ )                                                                                                                                                                                                                                                                                              |

| Trial (Country)                              | Study Design                                         | Patient Population and Caregiver's Relationship to Patients                                                                                                                        | Caregiver Outcomes Assessed (Instrument)                                              | Intervention                                      |     | Comparator                                     |     | Results                                                                                                             |
|----------------------------------------------|------------------------------------------------------|------------------------------------------------------------------------------------------------------------------------------------------------------------------------------------|---------------------------------------------------------------------------------------|---------------------------------------------------|-----|------------------------------------------------|-----|---------------------------------------------------------------------------------------------------------------------|
|                                              |                                                      |                                                                                                                                                                                    |                                                                                       | Description                                       | n   | Description                                    | n   |                                                                                                                     |
|                                              |                                                      |                                                                                                                                                                                    |                                                                                       | Home visits only to provide teaching and training | 45  |                                                |     | Quality of life: $d=-1.09$ ( $p=1.00$ )                                                                             |
| <b>Yun et al, 2011 (Korea)</b> <sup>57</sup> | Multi-site, individually-randomized controlled trial | Patient: terminal cancer. Setting = outpatient. Mean age = 61.9 years. Percentage female = 43%<br><br>Caregivers: family caregiver. Mean age = 45.6 years. Percentage female = 66% | Anxiety (HADS), decisional conflict (DCS), depression (HADS), quality of life (CQOLC) | Educational video and companion workbook          | 216 | Educational video and workbook on pain control | 228 | Anxiety: $p=0.51$<br><br>Decisional conflict: $p=0.04$<br><br>Depression: $p<0.01$<br><br>Quality of life: $p=0.99$ |

**Legend:**

BC – Brief Cope  
CarGOQOL – Caregiver Oncology Quality of Life Questionnaire  
CASE-T – Cancer Self-Efficacy Scale – Transplant  
CBereavementI – Core Bereavement Items  
CBS – Care-Giving Burden Scale  
CBSEOLC – Caregiver's Burden Scale in End-of-Life Care  
CCS – Caregiver Competence Scale  
CESD – Center for Epidemiological Studies – Depression Scale  
CMS – Caregiver Mastery Scale  
COHQOLFCG – City of Hope Quality of Life Family Caregiver Version  
CPS – Caregiving Preparedness Scale  
CQLI-R – Caregiver Quality of Life Index – Revised  
CQOLC – Caregiver Quality of Life Index – Cancer  
CRA – Caregivers Reaction Assessment Scale  
CSI – Caregiver Strain Index  
DASS – Depression Anxiety Stress Scales  
DCS – Decision Conflict Scale  
FSFI – Female Sexual Function Index  
GAD-7 – Generalized Anxiety Disorder 7-item Scale  
GCS - General Closeness Scale  
GHQ – General Health Questionnaire

HADS – Hospital Anxiety and Depression Scale  
IES – Impact of Events Scale  
MOCS – Measure of Current Status  
MSAS – Memorial Symptom Assessment Scale  
MSHQ – Male Sexual Health Questionnaire  
PCS – Preparedness for Caregiving Scale  
PDT – Preparedness Scale  
PHQ-9 – Patient Health Questionnaire 9-item Scale  
POMS-TMD – Profile of Mood States, Total Mood Disturbance  
PSS – Perceived Stress Scale  
QOLTI-F – Quality of Life in Life-Threatening Illness  
RCS – Rewards of Caregiving Scale  
SCNS-P&C – Supportive Care Needs Survey – Partners and Carers  
SF12 – 12-Item Short-Form Health Survey  
SF36 – 36-Item Short-Form Health Survey  
SSQ – Social Support Questionnaire  
STAI – State-Trait Anxiety Inventory

**Supplementary Table 2.** Study Characteristics, of Interventions Directed at Patient-Caregiver Dyad

| Trial (Country)                                   | Study Design                                          | Patient Population and Caregiver's Relationship to Patients                                                                                                                                                                | Caregiver Outcomes Assessed (Instrument)                                                                                                                                           | Intervention                                                                                                                                                                |    | Comparator                                                                             |    | Results                                                                                                                                                                                                                                                                                                                                                                                                                                                                                                                                                                                                                                                                                                                                         |
|---------------------------------------------------|-------------------------------------------------------|----------------------------------------------------------------------------------------------------------------------------------------------------------------------------------------------------------------------------|------------------------------------------------------------------------------------------------------------------------------------------------------------------------------------|-----------------------------------------------------------------------------------------------------------------------------------------------------------------------------|----|----------------------------------------------------------------------------------------|----|-------------------------------------------------------------------------------------------------------------------------------------------------------------------------------------------------------------------------------------------------------------------------------------------------------------------------------------------------------------------------------------------------------------------------------------------------------------------------------------------------------------------------------------------------------------------------------------------------------------------------------------------------------------------------------------------------------------------------------------------------|
|                                                   |                                                       |                                                                                                                                                                                                                            |                                                                                                                                                                                    | Description                                                                                                                                                                 | n  | Description                                                                            | n  |                                                                                                                                                                                                                                                                                                                                                                                                                                                                                                                                                                                                                                                                                                                                                 |
| <b>Ammari et al, 2018 (Denmark)</b> <sup>58</sup> | Multi-site, individually-randomized controlled trial  | <p>Patients: stage III-IV advanced solid cancer. Setting = mixed. Mean age = 67.4 years. Percentage female = 32%</p> <p>Caregivers: closest relative of patient. Mean age = 62.1 years. Percentage female = 75%</p>        | Anxiety (HADS), depression (HADS), quality of life (SF36)                                                                                                                          | Six home visits by a nurse, over 3 weeks, of family coping oriented palliative homecare for patients and their closest relative                                             | 28 | Usual treatment and care, including conventional community based homecare if necessary | 29 | <p>Anxiety, at 16 weeks: <math>\beta=-0.51</math> (<math>p=0.64</math>)</p> <p>Anxiety, at 24 weeks: <math>\beta=-0.51</math> (<math>p=0.64</math>)</p> <p>Depression, at 16 weeks: <math>\beta=-1.24</math> (<math>p=0.09</math>)</p> <p>Depression, at 24 weeks: <math>\beta=-0.01</math> (<math>p=0.99</math>)</p> <p>Quality of life, mental component, at 16 weeks: <math>\beta=1.72</math> (<math>p=0.47</math>)</p> <p>Quality of life, mental component, at 24 weeks: <math>\beta=-6.12</math> (<math>p=0.12</math>)</p> <p>Quality of life, physical component, at 16 weeks: <math>\beta=-1.79</math> (<math>p=0.64</math>)</p> <p>Quality of life, physical component, at 24 weeks: <math>\beta=2.05</math> (<math>p=0.40</math>)</p> |
| <b>Badr et al, 2015 (USA)</b> <sup>59</sup>       | Single-site, individually-randomized controlled trial | <p>Patients: advanced lung cancer. Setting = outpatient. Mean age = 68.2 years. Percentage female = 74%</p> <p>Caregivers: spouse/partner or other close family member. Mean age = 51.1 years. Percentage female = 69%</p> | Anxiety (PROMIS SF Anxiety), autonomy (Pierre instrument), burden (Zarit burden interview), competence (38-item questionnaire), depression (PROMIS SF Depression), relatedness (4- | Separate standardized tailored manuals, divided into 6 sections, for patients and caregivers, who participated together in 6 weekly 60-minute telephone counseling sessions | 20 | Standard oncologic care and primary palliative care for the patient                    | 19 | <p>Anxiety, at 8 weeks: <math>F=34.34</math> (<math>p&lt;0.01</math>)</p> <p>Autonomy, at 8 weeks: <math>F=21.46</math> (<math>p&lt;0.01</math>)</p> <p>Burden, at 8 weeks: <math>F=21.46</math> (<math>p&lt;0.01</math>)</p> <p>Competence, at 8 weeks: <math>F=132.34</math> (<math>p&lt;0.01</math>)</p> <p>Depression, at 8 weeks: <math>F=72.13</math> (<math>p&lt;0.01</math>)</p> <p>Relatedness, at 8 weeks: <math>F=63.66</math> (<math>p&lt;0.01</math>)</p>                                                                                                                                                                                                                                                                          |

| Trial (Country)                                                                                                                                                        | Study Design                                          | Patient Population and Caregiver's Relationship to Patients                                                                                                      | Caregiver Outcomes Assessed (Instrument)                                                                    | Intervention                                                                                                                                                                         |     | Comparator                                                                                                   |     | Results                                                                                                                                                                                                                                                                                                                                                                                                                                                       |
|------------------------------------------------------------------------------------------------------------------------------------------------------------------------|-------------------------------------------------------|------------------------------------------------------------------------------------------------------------------------------------------------------------------|-------------------------------------------------------------------------------------------------------------|--------------------------------------------------------------------------------------------------------------------------------------------------------------------------------------|-----|--------------------------------------------------------------------------------------------------------------|-----|---------------------------------------------------------------------------------------------------------------------------------------------------------------------------------------------------------------------------------------------------------------------------------------------------------------------------------------------------------------------------------------------------------------------------------------------------------------|
|                                                                                                                                                                        |                                                       |                                                                                                                                                                  |                                                                                                             | Description                                                                                                                                                                          | n   | Description                                                                                                  | n   |                                                                                                                                                                                                                                                                                                                                                                                                                                                               |
|                                                                                                                                                                        |                                                       |                                                                                                                                                                  | item questionnaire)                                                                                         |                                                                                                                                                                                      |     |                                                                                                              |     |                                                                                                                                                                                                                                                                                                                                                                                                                                                               |
| <b>Chih <i>et al</i>, 2013 (USA)</b> <sup>60</sup><br><b>DuBenske <i>et al</i>, 2014 (USA)</b> <sup>61</sup><br><b>Namkoong <i>et al</i>, 2012 (USA)</b> <sup>62</sup> | Multi-site, individually-randomized controlled trial  | Patients: stage IIIA, IIIB or IV non-small cell lung cancer. Setting = outpatient.<br><br>Caregivers: caregivers. Mean age = 55.6 years. Percentage female = 68% | Burden (CQOLC), disruptiveness (CQOLC), negative mood* (SV-POMS), physical burden (CBI), preparedness (FCI) | Comprehensive Health Enhancement Support System (CHES) website with electronic patient-reported outcome system (Clinician Report) to deliver needs and patient symptoms to clinician | 118 | CHES without Clinician Report                                                                                | 117 | Negative mood, at 6 months: 0.62 vs 0.88 ( $p<0.01$ )<br><br>Negative mood, at 12 months: 0.61 vs 0.93 ( $p<0.01$ )<br><br>Physical burden, at 6 months: 1.22 vs 1.22 ( $p=0.98$ )<br><br>Physical burden, at 12 months: 1.27 vs 1.22 ( $p=0.73$ )<br><br>Preparedness, at 6 months: 2.91 vs 2.83 ( $p=0.42$ )<br><br>Preparedness, at 12 months: 2.82 vs 2.79 ( $p=0.78$ )                                                                                   |
|                                                                                                                                                                        |                                                       |                                                                                                                                                                  |                                                                                                             |                                                                                                                                                                                      | 144 | Standard care plus laptop computer with Internet access and list of lung cancer and palliative care websites | 141 | Bonding, at 6 months: $\beta=0.17$ ( $p<0.05$ )<br><br>Burden, 0 to 8 months: $d=0.22$ ( $p=0.05$ )<br><br>Coping (active behavior), at 6 months: $\beta=-0.02$ ( $p>0.05$ )<br><br>Coping (positive reframing), at 6 months: $\beta=-0.15$ ( $p>0.05$ )<br><br>Coping (instrumental support), at 6 months: $\beta=-0.05$ ( $p>0.05$ )<br><br>Disruptiveness, 0 to 8 months: $d=0.21$ ( $p=0.07$ )<br><br>Negative mood, 0 to 8 months: $d=0.21$ ( $p=0.05$ ) |
| <b>Clark <i>et al</i>, 2013 (USA)</b> <sup>63</sup>                                                                                                                    | Single-site, individually-randomized controlled trial | Patients: advanced cancer. Setting = outpatient. Mean age =                                                                                                      | Mood (POMB), Quality of life                                                                                | Six structured 90-minute multidisciplinary sessions, where                                                                                                                           | 65  | Standard medical care                                                                                        | 66  | Mood, at 4 weeks: $\Delta=0.32$ ( $p=0.02$ )<br><br>Mood, at 27 weeks: $\Delta=0.27$ ( $p=0.36$ )                                                                                                                                                                                                                                                                                                                                                             |

| Trial (Country)                                     | Study Design | Patient Population and Caregiver's Relationship to Patients       | Caregiver Outcomes Assessed (Instrument) | Intervention                                  |   | Comparator  |   | Results                                                                                                                                                                                                                                                                                                                                                                                                                                                                                                                                                                                                                                                                                                                                                                                                                                                                                                                                                                                                                                                                                                                                                                                                                           |
|-----------------------------------------------------|--------------|-------------------------------------------------------------------|------------------------------------------|-----------------------------------------------|---|-------------|---|-----------------------------------------------------------------------------------------------------------------------------------------------------------------------------------------------------------------------------------------------------------------------------------------------------------------------------------------------------------------------------------------------------------------------------------------------------------------------------------------------------------------------------------------------------------------------------------------------------------------------------------------------------------------------------------------------------------------------------------------------------------------------------------------------------------------------------------------------------------------------------------------------------------------------------------------------------------------------------------------------------------------------------------------------------------------------------------------------------------------------------------------------------------------------------------------------------------------------------------|
|                                                     |              |                                                                   |                                          | Description                                   | n | Description | n |                                                                                                                                                                                                                                                                                                                                                                                                                                                                                                                                                                                                                                                                                                                                                                                                                                                                                                                                                                                                                                                                                                                                                                                                                                   |
| <b>Lapid <i>et al</i>, 2016 (USA)</b> <sup>64</sup> |              | 59.3 years. Percentage female = 34%<br><br>Caregivers: caregiver. | (CQOLC, LASA)                            | caregivers invited for sessions 1, 3, 4 and 6 |   |             |   | <p>Mood, tension/anxiety, at 4 weeks: <math>\Delta=0.18</math> (<math>p=0.61</math>)</p> <p>Mood, tension/anxiety, at 27 weeks: <math>\Delta=0.16</math> (<math>p=0.63</math>)</p> <p>Mood, vigor/activity, at 4 weeks: <math>\Delta=0.48</math> (<math>p=0.02</math>)</p> <p>Mood, vigor/activity, at 27 weeks: <math>\Delta=0.44</math> (<math>p=0.07</math>)</p> <p>Mood, fatigue/inertia, at 4 weeks: <math>\Delta=0.45</math> (<math>p=0.02</math>)</p> <p>Mood, fatigue/inertia, at 27 weeks: <math>\Delta=0.57</math> (<math>p=0.01</math>)</p> <p>Mood, depression/dejection, at 4 weeks: <math>\Delta=0.18</math> (<math>p=0.11</math>)</p> <p>Mood, depression/dejection, at 27 weeks: <math>\Delta=0.11</math> (<math>p=0.73</math>)</p> <p>Mood, confusion/bewilderment, at 4 weeks: <math>\Delta=0.11</math> (<math>p=0.44</math>)</p> <p>Mood, confusion/bewilderment, at 27 weeks: <math>\Delta=0.18</math> (<math>p=0.76</math>)</p> <p>Mood, anger/hostility, at 4 weeks: <math>\Delta=0.15</math> (<math>p=0.89</math>)</p> <p>Mood, anger/hostility, at 27 weeks: <math>\Delta=0.04</math> (<math>p=0.85</math>)</p> <p>Quality of life (LASA), at 4 weeks: <math>\Delta=0.18</math> (<math>p=0.26</math>)</p> |

| Trial (Country) | Study Design | Patient Population and Caregiver's Relationship to Patients | Caregiver Outcomes Assessed (Instrument) | Intervention |   | Comparator  |   | Results                                                                                                                                                                                                                                                                                                                                                                                                                                                                                                                                                                                                                                                                                                                                                                                                                                                                                                                                                                                                                                                                                                                                                                                                                                                                                                                                                                                                                                              |
|-----------------|--------------|-------------------------------------------------------------|------------------------------------------|--------------|---|-------------|---|------------------------------------------------------------------------------------------------------------------------------------------------------------------------------------------------------------------------------------------------------------------------------------------------------------------------------------------------------------------------------------------------------------------------------------------------------------------------------------------------------------------------------------------------------------------------------------------------------------------------------------------------------------------------------------------------------------------------------------------------------------------------------------------------------------------------------------------------------------------------------------------------------------------------------------------------------------------------------------------------------------------------------------------------------------------------------------------------------------------------------------------------------------------------------------------------------------------------------------------------------------------------------------------------------------------------------------------------------------------------------------------------------------------------------------------------------|
|                 |              |                                                             |                                          | Description  | n | Description | n |                                                                                                                                                                                                                                                                                                                                                                                                                                                                                                                                                                                                                                                                                                                                                                                                                                                                                                                                                                                                                                                                                                                                                                                                                                                                                                                                                                                                                                                      |
|                 |              |                                                             |                                          |              |   |             |   | <p>Quality of life (LASA), at 27 weeks: <math>\Delta=0.14</math> (<math>p=0.65</math>)</p> <p>Quality of life (LASA), mental well-being, at 4 weeks: <math>\Delta=0.16</math> (<math>p=0.24</math>)</p> <p>Quality of life (LASA), mental well-being, at 27 weeks: <math>\Delta=0.17</math> (<math>p=0.42</math>)</p> <p>Quality of life (LASA), physical well-being, at 4 weeks: <math>\Delta=0.30</math> (<math>p=0.08</math>)</p> <p>Quality of life (LASA), physical well-being, at 27 weeks: <math>\Delta=0.30</math> (<math>p=0.10</math>)</p> <p>Quality of life (LASA), emotional well-being, at 4 weeks: <math>\Delta=0.02</math> (<math>p=0.87</math>)</p> <p>Quality of life (LASA), emotional well-being, at 27 weeks: <math>\Delta=0.16</math> (<math>p=0.61</math>)</p> <p>Quality of life (LASA), social activity, at 4 weeks: <math>\Delta=0.03</math> (<math>p=0.82</math>)</p> <p>Quality of life (LASA), social activity, at 27 weeks: <math>\Delta=0.17</math> (<math>p=0.40</math>)</p> <p>Quality of life (LASA), spiritual well-being, at 4 weeks: <math>\Delta=0.29</math> (<math>p=0.05</math>)</p> <p>Quality of life (LASA), spiritual well-being, at 27 weeks: <math>\Delta=0.13</math> (<math>p=0.46</math>)</p> <p>Quality of life (LASA), fatigue, at 4 weeks: <math>\Delta=0.03</math> (<math>p=0.93</math>)</p> <p>Quality of life (LASA), fatigue, at 27 weeks: <math>\Delta=0.04</math> (<math>p=0.76</math>)</p> |

| Trial (Country) | Study Design | Patient Population and Caregiver's Relationship to Patients | Caregiver Outcomes Assessed (Instrument) | Intervention |   | Comparator  |   | Results                                                                                                                                                                                                                                                                                                                                                                                                                                                                                                                                                                                                                                                                                                                                                                                                                                                                                                                                                                                                                                                                                                                                                                                                                                                                                                                                                                                                |
|-----------------|--------------|-------------------------------------------------------------|------------------------------------------|--------------|---|-------------|---|--------------------------------------------------------------------------------------------------------------------------------------------------------------------------------------------------------------------------------------------------------------------------------------------------------------------------------------------------------------------------------------------------------------------------------------------------------------------------------------------------------------------------------------------------------------------------------------------------------------------------------------------------------------------------------------------------------------------------------------------------------------------------------------------------------------------------------------------------------------------------------------------------------------------------------------------------------------------------------------------------------------------------------------------------------------------------------------------------------------------------------------------------------------------------------------------------------------------------------------------------------------------------------------------------------------------------------------------------------------------------------------------------------|
|                 |              |                                                             |                                          | Description  | n | Description | n |                                                                                                                                                                                                                                                                                                                                                                                                                                                                                                                                                                                                                                                                                                                                                                                                                                                                                                                                                                                                                                                                                                                                                                                                                                                                                                                                                                                                        |
|                 |              |                                                             |                                          |              |   |             |   | <p>Quality of life (LASA), social support, at 4 weeks: <math>\Delta=0.13</math> (<math>p=0.76</math>)</p> <p>Quality of life (LASA), social support, at 27 weeks: <math>\Delta=0.17</math> (<math>p=0.36</math>)</p> <p>Quality of life (LASA), financial well-being, at 4 weeks: <math>\Delta=0.06</math> (<math>p=0.27</math>)</p> <p>Quality of life (LASA), financial well-being, at 27 weeks: <math>\Delta=0.40</math> (<math>p=0.05</math>)</p> <p>Quality of life (LASA), legal concerns, at 4 weeks: <math>\Delta=0.07</math> (<math>p=0.58</math>)</p> <p>Quality of life (LASA), legal concerns, at 27 weeks: <math>\Delta=0.25</math> (<math>p=0.33</math>)</p> <p>Quality of life (CQOLC), at 4 weeks: <math>\Delta=0.20</math> (<math>p=0.32</math>)</p> <p>Quality of life (CQOLC), at 27 weeks: <math>\Delta=0.20</math> (<math>p=0.38</math>)</p> <p>Quality of life (CQOLC), burden, at 4 weeks: <math>\Delta=0.04</math> (<math>p=0.95</math>)</p> <p>Quality of life (CQOLC), burden, at 27 weeks: <math>\Delta=0.01</math> (<math>p=0.93</math>)</p> <p>Quality of life (CQOLC), disruptiveness, at 4 weeks: <math>\Delta=0.16</math> (<math>p=0.28</math>)</p> <p>Quality of life (CQOLC), disruptiveness, at 27 weeks: <math>\Delta=0.38</math> (<math>p=0.05</math>)</p> <p>Quality of life (CQOLC), adaptation, at 4 weeks: <math>\Delta=0.48</math> (<math>p=0.01</math>)</p> |



| Trial (Country)                                                                                                     | Study Design                                         | Patient Population and Caregiver's Relationship to Patients                                                                                                                                                              | Caregiver Outcomes Assessed (Instrument)                                | Intervention                                                                                                                                                                                                                 |    | Comparator                                            |    | Results                                                                                                                                                                                                                                                                                                                                                                                                                                                                                                                                                                                                                                                                                                                                                                                                                                                                                                                                                                                                                                                                                         |
|---------------------------------------------------------------------------------------------------------------------|------------------------------------------------------|--------------------------------------------------------------------------------------------------------------------------------------------------------------------------------------------------------------------------|-------------------------------------------------------------------------|------------------------------------------------------------------------------------------------------------------------------------------------------------------------------------------------------------------------------|----|-------------------------------------------------------|----|-------------------------------------------------------------------------------------------------------------------------------------------------------------------------------------------------------------------------------------------------------------------------------------------------------------------------------------------------------------------------------------------------------------------------------------------------------------------------------------------------------------------------------------------------------------------------------------------------------------------------------------------------------------------------------------------------------------------------------------------------------------------------------------------------------------------------------------------------------------------------------------------------------------------------------------------------------------------------------------------------------------------------------------------------------------------------------------------------|
|                                                                                                                     |                                                      |                                                                                                                                                                                                                          |                                                                         | Description                                                                                                                                                                                                                  | n  | Description                                           | n  |                                                                                                                                                                                                                                                                                                                                                                                                                                                                                                                                                                                                                                                                                                                                                                                                                                                                                                                                                                                                                                                                                                 |
|                                                                                                                     |                                                      |                                                                                                                                                                                                                          |                                                                         |                                                                                                                                                                                                                              |    |                                                       |    | <p>Quality of life (CQOLC), adaptation, at 27 weeks: <math>\Delta=0.35</math> (<math>p=0.07</math>)</p> <p>Quality of life (CQOLC), financial concerns, at 4 weeks: <math>\Delta=0.15</math> (<math>p=0.62</math>)</p> <p>Quality of life (CQOLC), financial concerns, at 27 weeks: <math>\Delta=0.46</math> (<math>p=0.02</math>)</p>                                                                                                                                                                                                                                                                                                                                                                                                                                                                                                                                                                                                                                                                                                                                                          |
| <p><b>Dionne-Odom et al, 2015 (USA)</b> <sup>65</sup></p> <p><b>Dionne-Odom et al, 2016 (USA)</b> <sup>66</sup></p> | Multi-site, individually-randomized controlled trial | <p>Patients: advanced stage recurrent or progressive metastatic cancer. Setting = outpatient.</p> <p>Caregivers: knows the patient well and involved in medical care. Mean age = 59.5 years. Percentage female = 79%</p> | Burden (MBCB), depression (CESD), grief (PG13), quality of life (CQOLC) | Educate, Nurture, Advise Before Life Ends (ENABLE) intervention plus three structured weekly caregiver telephone coaching sessions with an advanced practice palliative care nurse, monthly follow-up and a bereavement call | 61 | ENABLE intervention, 3 months after random assignment | 61 | <p>Burden, objective burden, 0 to 3 months: <math>d=0.09</math> (<math>p=0.62</math>)</p> <p>Burden, objective burden, 0 to 36 weeks before death: <math>d=-0.18</math> (<math>p=0.27</math>)</p> <p>Burden, stress burden, 0 to 3 months: <math>d=-0.21</math> (<math>p=0.27</math>)</p> <p>Burden, stress burden, 0 to 36 weeks before death: <math>d=-0.44</math> (<math>p=0.01</math>)</p> <p>Burden, demand burden, 0 to 3 months: <math>d=0</math> (<math>p=0.99</math>)</p> <p>Burden, stress burden, 0 to 36 weeks before death: <math>d=-0.23</math> (<math>p=0.22</math>)</p> <p>Depression, 0 to 3 months: <math>d=-0.32</math> (<math>p=0.02</math>)</p> <p>Depression, 0 to 36 weeks before death: <math>d=-0.39</math> (<math>p=0.02</math>)</p> <p>Depression, after death: <math>d=-0.34</math> (<math>p=0.39</math>)</p> <p>Grief, after death: <math>d=-0.35</math> (<math>p=0.21</math>)</p> <p>Quality of life, 0 to 3 months: <math>d=-0.31</math> (<math>p=0.37</math>)</p> <p>Quality of life, 0 to 36 weeks before death: <math>d=-0.3</math> (<math>p=0.07</math>)</p> |

| Trial (Country)                              | Study Design                                          | Patient Population and Caregiver's Relationship to Patients                                                                                                                                                                                  | Caregiver Outcomes Assessed (Instrument)            | Intervention                                                                                                                                                     |    | Comparator                                                 |    | Results                                                                                                                                                                                                                                                                                                                                                                                                                                                                                    |
|----------------------------------------------|-------------------------------------------------------|----------------------------------------------------------------------------------------------------------------------------------------------------------------------------------------------------------------------------------------------|-----------------------------------------------------|------------------------------------------------------------------------------------------------------------------------------------------------------------------|----|------------------------------------------------------------|----|--------------------------------------------------------------------------------------------------------------------------------------------------------------------------------------------------------------------------------------------------------------------------------------------------------------------------------------------------------------------------------------------------------------------------------------------------------------------------------------------|
|                                              |                                                       |                                                                                                                                                                                                                                              |                                                     | Description                                                                                                                                                      | n  | Description                                                | n  |                                                                                                                                                                                                                                                                                                                                                                                                                                                                                            |
| <b>Keefe et al, 2005 (USA)</b> <sup>67</sup> | Multi-site, individually-randomized controlled trial  | <p>Patient: advanced cancer. Setting = outpatient. Mean age = 60.5 years. Percentage male = 56%</p> <p>Caregivers: spouse. Mean age = 58.5 years. Percentage female = 62%</p>                                                                | Mood (POMB), self-efficacy (CPSS), strain (CSI)     | Three face-to-face sessions in patient's home that integrated education about cancer pain with training of patients and caregivers in pain management strategies | 41 | Routine care through medical outpatient or hospice program | 37 | <p>Mood (negative mood), post-treatment: 0.89 vs 1.07 (<math>p=0.24</math>)</p> <p>Mood (positive mood), post-treatment: 1.77 vs 1.94 (<math>p=0.36</math>)</p> <p>Self-efficacy, pain, post-treatment: 62.64 vs 39.59 (<math>p&lt;0.01</math>)</p> <p>Self-efficacy, physical activities, post-treatment: 62.70 vs 58.32</p> <p>Self-efficacy, other symptoms, post-treatment: 68.75 vs 52.46 (<math>p=0.01</math>)</p> <p>Strain, post-treatment: 6.39 vs 7.17 (<math>p=0.06</math>)</p> |
| <b>Kubo et al, 2020 (USA)</b> <sup>68</sup>  | Multi-site, cluster-randomized controlled trial       | <p>Patients: metastatic solid malignancies or hematological cancers. Setting = outpatient. Mean age = 66.4 years. Percentage female = 70%</p> <p>Caregivers: primary informal caregivers. Mean age = 62.4 years. Percentage female = 79%</p> | Distress (NCCNDT), mindfulness (FFMQ-SF)            | 6-week mobile-based mindfulness program or 6-week webinar-based mindfulness program                                                                              | 22 | Waitlist control arm, receiving usual care                 | 17 | <p>Distress, over time: <math>p&gt;0.05</math></p> <p>Mindfulness, over time: <math>p&gt;0.05</math></p>                                                                                                                                                                                                                                                                                                                                                                                   |
| <b>Li et al, 2019 (China)</b> <sup>69</sup>  | Single-site, individually-randomized controlled trial | <p>Patients: stage III-IV non-small cell lung cancer. Setting = outpatient. Mean age = 55 years. Percentage female = 70%</p> <p>Caregivers: spouse or adult child living with patient. Mean age = 50</p>                                     | Family relationships (FES), quality of life (CQOLC) | Six 45-minute sessions of multidisciplinary components including physical therapy, coping and communication strategies, and education about cancer symptoms,     | 80 | Control group                                              | 79 | <p>Family relationships, cohesion, at 8 weeks: <math>\Delta=0.07</math> (<math>p=0.02</math>)</p> <p>Family relationships, conflict, at 8 weeks: <math>\Delta=1.08</math> (<math>p=0.03</math>)</p> <p>Family relationships, expressiveness, at 8 weeks: <math>\Delta=0.03</math> (<math>p=0.06</math>)</p> <p>Quality of life, burden, at 8 weeks: <math>\Delta=1.5</math> (<math>p=0.08</math>)</p>                                                                                      |

| Trial (Country)                                  | Study Design                                          | Patient Population and Caregiver's Relationship to Patients                                                                                                                                            | Caregiver Outcomes Assessed (Instrument)                                            | Intervention                                                                                                       |     | Comparator    |     | Results                                                                                                                                                                                                                                                                                                                                                                                                                                                                                                                                                                                                                                                                                                                                                   |
|--------------------------------------------------|-------------------------------------------------------|--------------------------------------------------------------------------------------------------------------------------------------------------------------------------------------------------------|-------------------------------------------------------------------------------------|--------------------------------------------------------------------------------------------------------------------|-----|---------------|-----|-----------------------------------------------------------------------------------------------------------------------------------------------------------------------------------------------------------------------------------------------------------------------------------------------------------------------------------------------------------------------------------------------------------------------------------------------------------------------------------------------------------------------------------------------------------------------------------------------------------------------------------------------------------------------------------------------------------------------------------------------------------|
|                                                  |                                                       |                                                                                                                                                                                                        |                                                                                     | Description                                                                                                        | n   | Description   | n   |                                                                                                                                                                                                                                                                                                                                                                                                                                                                                                                                                                                                                                                                                                                                                           |
|                                                  |                                                       | years. Percentage female = 86%                                                                                                                                                                         |                                                                                     | physical and mental health, and treatment, over 8 weeks                                                            |     |               |     | <p>Quality of life, disruptiveness, at 8 weeks: <math>\Delta=3.4</math> (<math>p=0.06</math>)</p> <p>Quality of life, adaptation, at 8 weeks: <math>\Delta=6.7</math> (<math>p=0.04</math>)</p> <p>Quality of life, financial, at 8 weeks: <math>\Delta=5.9</math> (<math>p=0.05</math>)</p>                                                                                                                                                                                                                                                                                                                                                                                                                                                              |
| <b>McLean et al, 2013 (Canada)</b> <sup>70</sup> | Single-site, individually-randomized controlled trial | <p>Patients: metastatic cancer. Setting = outpatient. Mean age = 50.7 years. Percentage female = 55%</p> <p>Caregivers: Romantic partner. Mean age = 49.8 years. Percentage female = 45%</p>           | Burden (CBurdenI), depression (BDI), hopelessness (BHS), marital functioning (RDAS) | Eight-session one-hour emotionally-focused therapy intervention adapted for couples in the advanced cancer setting | 22  | Standard care | 20  | <p>Burden, after intervention: <math>F=49.69</math> (<math>p&lt;0.01</math>)</p> <p>Burden, 3 months after intervention: <math>F=12.00</math> (<math>p&lt;0.01</math>)</p> <p>Depression, after intervention: <math>F=30.43</math> (<math>p&lt;0.01</math>)</p> <p>Depression, 3 months after intervention: <math>F=33.62</math> (<math>p&lt;0.01</math>)</p> <p>Hopelessness, after intervention: <math>F=38.87</math> (<math>p&lt;0.01</math>)</p> <p>Hopelessness, 3 months after intervention: <math>F=78.35</math> (<math>p&lt;0.01</math>)</p> <p>Marital functioning, after intervention: <math>F=35.38</math> (<math>p&lt;0.01</math>)</p> <p>Marital functioning, 3 months after intervention: <math>F=91.08</math> (<math>p&lt;0.01</math>)</p> |
| <b>Meyers et al, 2011 (USA)</b> <sup>71</sup>    | Multi-site, individually-randomized controlled trial  | <p>Patients: advanced cancer. Setting = outpatient. Mean age = 61.5 years. Percentage female = 56%</p> <p>Caregivers: adult regularly involved with patient and their care. Mean age = 61.4 years.</p> | Social problem solving (SPSI), quality of life (COHQOL)                             | Three sessions of the COPE cognitive-behavioral problem-solving educational intervention during one month          | 324 | Standard care | 117 | <p>Social problem solving (avoidance): <math>\beta=0.38</math> (<math>p=0.12</math>)</p> <p>Social problem solving (impulsivity): <math>\beta=-0.31</math> (<math>p=0.22</math>)</p> <p>Social problem solving (negative approaches): <math>\beta=0.12</math> (<math>p=0.62</math>)</p>                                                                                                                                                                                                                                                                                                                                                                                                                                                                   |

| Trial (Country)                                | Study Design                                          | Patient Population and Caregiver's Relationship to Patients                                                                                                                                          | Caregiver Outcomes Assessed (Instrument)                                                                                                                                    | Intervention                                                                                                                                                                                                                                          |    | Comparator                                                       |    | Results                                                                                                                                                                                                                                                                                                                                                                                                                                                                                                                                            |
|------------------------------------------------|-------------------------------------------------------|------------------------------------------------------------------------------------------------------------------------------------------------------------------------------------------------------|-----------------------------------------------------------------------------------------------------------------------------------------------------------------------------|-------------------------------------------------------------------------------------------------------------------------------------------------------------------------------------------------------------------------------------------------------|----|------------------------------------------------------------------|----|----------------------------------------------------------------------------------------------------------------------------------------------------------------------------------------------------------------------------------------------------------------------------------------------------------------------------------------------------------------------------------------------------------------------------------------------------------------------------------------------------------------------------------------------------|
|                                                |                                                       |                                                                                                                                                                                                      |                                                                                                                                                                             | Description                                                                                                                                                                                                                                           | n  | Description                                                      | n  |                                                                                                                                                                                                                                                                                                                                                                                                                                                                                                                                                    |
|                                                |                                                       | Percentage female = 31%                                                                                                                                                                              |                                                                                                                                                                             |                                                                                                                                                                                                                                                       |    |                                                                  |    | <p>Social problem solving (positive approaches): <math>\beta=-0.47</math> (<math>p=0.17</math>)</p> <p>Social problem solving (rational approaches): <math>\beta=-0.30</math> (<math>p=0.33</math>)</p> <p>Quality of life (physical): <math>\beta=0.09</math> (<math>p=0.61</math>)</p> <p>Quality of life (psychological): <math>\beta=0.59</math> (<math>p=0.16</math>)</p> <p>Quality of life (social): <math>\beta=0.46</math> (<math>p=0.09</math>)</p> <p>Quality of life (spiritual): <math>\beta=0.76</math> (<math>p&lt;0.01</math>)</p> |
| <b>Milbury et al, 2020 (USA)</b> <sup>72</sup> | Single-site, individually-randomized controlled trial | <p>Patients: stage IV non small cell lung cancer. Setting = outpatient. Mean age = 64.6 years. Percentage female = 51%</p> <p>Caregivers: spouse. Mean age = 63.6 years. Percentage female = 52%</p> | Depression (CESD), spiritual well-being (FACT-SWB), stress (IES)                                                                                                            | Four weekly 60-minute couple-based meditation sessions via videoconference with psychological counselor intern                                                                                                                                        | 50 | Usual care                                                       | 25 | <p>Depression, over time: <math>F=3.70</math> (<math>p&lt;0.05</math>)</p> <p>Spiritual well-being, over time: <math>F=1.79</math> (<math>p=0.17</math>)</p> <p>Stress, over time: <math>F=0.32</math> (<math>p=0.73</math>)</p>                                                                                                                                                                                                                                                                                                                   |
| <b>Mosher et al, 2018 (USA)</b> <sup>73</sup>  | Multi-site, individually-randomized controlled trial  | <p>Patients: stage IV GI cancer. Setting = outpatient.</p> <p>Caregivers: family member. Percentage female = 66%</p>                                                                                 | Anxiety (PROMIS SF Anxiety), burden (Zarit interview), depression (PROMIS SF Depression), distress (Distress Thermometer), emotional support (PROMIS SF Emotional Support), | Five sessions, with therapist, of Peer Helping intervention (contributing to handouts on coping skills for other patients and caregivers coping with cancer) in addition to Coping Skills intervention (discussing own experiences related to various | 25 | Four sessions with therapist of Coping Skills intervention alone | 25 | <p>Anxiety, 0 to 5 weeks after intervention: <math>F=1.88</math> (<math>p=0.16</math>)</p> <p>Burden, 0 to 5 weeks after intervention: <math>F=4.74</math> (<math>p=0.01</math>)</p> <p>Depression, 0 to 5 weeks after intervention: <math>F=2.55</math> (<math>p=0.09</math>)</p> <p>Distress, 0 to 5 weeks after intervention: <math>F=2.57</math> (<math>p=0.08</math>)</p> <p>Emotional support, 0 to 5 weeks after intervention: <math>F=1.64</math> (<math>p=0.20</math>)</p>                                                                |

| Trial (Country)                                         | Study Design                              | Patient Population and Caregiver's Relationship to Patients                                                                                                                                                                    | Caregiver Outcomes Assessed (Instrument)                                                         | Intervention                                                                                                                                                                                                                   |    | Comparator  |    | Results                                                                                                                                                                                                                                                                                                                                                                                                                                                                                                                                                                                                                                                                                                                                                                                                                                                                                                                                                                                                                                                                                   |
|---------------------------------------------------------|-------------------------------------------|--------------------------------------------------------------------------------------------------------------------------------------------------------------------------------------------------------------------------------|--------------------------------------------------------------------------------------------------|--------------------------------------------------------------------------------------------------------------------------------------------------------------------------------------------------------------------------------|----|-------------|----|-------------------------------------------------------------------------------------------------------------------------------------------------------------------------------------------------------------------------------------------------------------------------------------------------------------------------------------------------------------------------------------------------------------------------------------------------------------------------------------------------------------------------------------------------------------------------------------------------------------------------------------------------------------------------------------------------------------------------------------------------------------------------------------------------------------------------------------------------------------------------------------------------------------------------------------------------------------------------------------------------------------------------------------------------------------------------------------------|
|                                                         |                                           |                                                                                                                                                                                                                                |                                                                                                  | Description                                                                                                                                                                                                                    | n  | Description | n  |                                                                                                                                                                                                                                                                                                                                                                                                                                                                                                                                                                                                                                                                                                                                                                                                                                                                                                                                                                                                                                                                                           |
|                                                         |                                           |                                                                                                                                                                                                                                | fatigue (PROMIS SF Fatigue), self-efficacy (MOCS), sense of meaning in life and peace (FACIT-Sp) | quality of life issues)                                                                                                                                                                                                        |    |             |    | <p>Fatigue, 0 to 5 weeks after intervention: <math>F=7.08</math> (<math>p&lt;0.01</math>)</p> <p>Self-efficacy, 0 to 5 weeks after intervention: <math>F=1.31</math> (<math>p=0.28</math>)</p> <p>Sense of meaning in life and peace, 0 to 5 weeks after intervention: <math>F=3.37</math> (<math>p=0.04</math>)</p>                                                                                                                                                                                                                                                                                                                                                                                                                                                                                                                                                                                                                                                                                                                                                                      |
| <b>Northouse <i>et al</i>, 2005 (USA)</b> <sup>74</sup> | Multi-site, individually-randomized trial | <p>Patients: advanced breast cancer. Setting = outpatient. Mean age = 54 years.</p> <p>Caregivers: family member or significant other identified as primary source of emotional and physical support. Mean age = 52 years.</p> | Appraisal (ACS), coping (BC), hopelessness (BHS), quality of life (FACT-G) uncertainty (MUIS)    | <p>FOCUS Program: Family involvement, Optimistic attitude, Coping effectiveness, Uncertainty reduction and Symptom management.</p> <p>Three 1.5 hour home visits with patient and caregiver, and two 30-minute phone calls</p> | 94 | Usual care  | 88 | <p>Appraisal, from 0-3 months: <math>F=3.90</math> (<math>p=0.04</math>)</p> <p>Appraisal, from 3-6 months: <math>F=0.80</math> (<math>p=0.37</math>)</p> <p>Coping (active coping), from 0-3 months: <math>F=0.19</math> (<math>p=0.67</math>)</p> <p>Coping (active coping), from 3-6 months: <math>F=1.03</math> (<math>p=0.31</math>)</p> <p>Coping (avoidant coping), from 0-3 months: <math>F=0.63</math> (<math>p=0.43</math>)</p> <p>Coping (avoidant coping), from 3-6 months: <math>F=0.82</math> (<math>p=0.37</math>)</p> <p>Hopelessness, from 0-3 months: <math>F=0.07</math> (<math>p=0.80</math>)</p> <p>Hopelessness, from 3-6 months: <math>F=1.48</math> (<math>p=0.23</math>)</p> <p>Quality of life (mental), from 0-3 months: <math>F=0.06</math> (<math>p=0.81</math>)</p> <p>Quality of life (mental), from 3-6 months: <math>F=0.32</math> (<math>p=0.57</math>)</p> <p>Quality of life (physical), from 0-3 months: <math>F=0.01</math> (<math>p=0.91</math>)</p> <p>Quality of life (physical), from 3-6 months: <math>F=0.51</math> (<math>p=0.48</math>)</p> |

| Trial (Country)                                  | Study Design                                          | Patient Population and Caregiver's Relationship to Patients                                                                                                                                                                                         | Caregiver Outcomes Assessed (Instrument)                                                                                                                                                                                            | Intervention                                                                                                                                                                                                            |                | Comparator                                                                                                |     | Results                                                                                                                                                                                                                                                                                                                                                                                                                                                                                                                                                                                                                                                                          |
|--------------------------------------------------|-------------------------------------------------------|-----------------------------------------------------------------------------------------------------------------------------------------------------------------------------------------------------------------------------------------------------|-------------------------------------------------------------------------------------------------------------------------------------------------------------------------------------------------------------------------------------|-------------------------------------------------------------------------------------------------------------------------------------------------------------------------------------------------------------------------|----------------|-----------------------------------------------------------------------------------------------------------|-----|----------------------------------------------------------------------------------------------------------------------------------------------------------------------------------------------------------------------------------------------------------------------------------------------------------------------------------------------------------------------------------------------------------------------------------------------------------------------------------------------------------------------------------------------------------------------------------------------------------------------------------------------------------------------------------|
|                                                  |                                                       |                                                                                                                                                                                                                                                     |                                                                                                                                                                                                                                     | Description                                                                                                                                                                                                             | n              | Description                                                                                               | n   |                                                                                                                                                                                                                                                                                                                                                                                                                                                                                                                                                                                                                                                                                  |
|                                                  |                                                       |                                                                                                                                                                                                                                                     |                                                                                                                                                                                                                                     |                                                                                                                                                                                                                         |                |                                                                                                           |     | Uncertainty, from 0-3 months: F=1.13 ( $p=0.07$ )<br>Uncertainty, from 3-6 months: F=1.57 ( $p=0.21$ )                                                                                                                                                                                                                                                                                                                                                                                                                                                                                                                                                                           |
| <b>Northouse et al, 2013 (USA)</b> <sup>75</sup> | Multi-site, individually-randomized controlled trial  | <p>Patients: advanced breast, colorectal, lung or prostate cancer. Setting = outpatient. Mean age: 60.5 years. Percentage female = 61%</p> <p>Caregivers: primary caregiver identified by patient. Mean age 56.7 years. Percentage female = 56%</p> | Appraisals of illness (ACS), communication (LMSS), coping strategies (BC), dyadic support (SSQ), healthy behaviors (scale), hopelessness (BHS), uncertainty (MUIS), risk for distress, self-efficacy (LCSS), quality of life (FACT) | <p>Brief FOCUS: three contacts (two 90-min house visits and one 30-min phone sessions)</p> <p>Extensive FOCUS: six contacts (four 90-min house visits and two 30-min phone sessions)</p>                                | 159<br><br>162 | Usual care                                                                                                | 163 | <p>Appraisal, hopelessness and uncertainty, 0 to 6 months: F=0.99 (<math>p=0.46</math>)</p> <p>Coping strategies, 0 to 6 months: F=2.15 (<math>p=0.01</math>)</p> <p>Communication and dyadic support, 0 to 6 months: F=1.04 (<math>p=0.41</math>)</p> <p>Self-efficacy, 0 to 6 months: F=2.84 (<math>p=0.02</math>)</p> <p>Quality of life, social domain, 0 to 6 months: F=4.28 (<math>p&lt;0.01</math>)</p> <p>Quality of life, emotional domain, 0 to 6 months: F=0.80 (<math>p=0.52</math>)</p> <p>Quality of life, functional domain, 0 to 6 months: F=0.35 (<math>p=0.84</math>)</p> <p>Quality of life, physical domain, 0 to 6 months: F=1.16 (<math>p=0.33</math>)</p> |
| <b>Porter et al, 2017 (USA)</b> <sup>76</sup>    | Single-site, individually-randomized controlled trial | <p>Patients: stage 3 or 4 gastrointestinal cancer. Setting = outpatient. Mean age = 54.7 years. Percentage female = 31%</p> <p>Caregiver: spouse. Mean age = 52.3 years. Percentage female = 69%</p>                                                | Acceptability (CSQ8), communication (MSI), distress (IES), intimacy (MSIS), psychological growth (PTGI), relationship satisfaction (RDAS), self-efficacy (SSS)                                                                      | Couples Communication Skills Training: systematically trained couples in two communication skills to help patients and their partners (i) disclose their thoughts and feelings related to the cancer experience to each | 15             | Health Lifestyle Information: provided health information relevant to cancer in a supportive environment. | 17  | <p>Acceptability, after intervention: 3.43 vs 3.18</p> <p>Communication, affective communication, after intervention: ES=-0.14</p> <p>Communication, problem solving communication, after intervention: ES=-0.07</p> <p>Distress, after intervention: ES=-0.14</p> <p>Intimacy, after intervention: ES=-0.07</p> <p>Psychological growth, after intervention: ES=0.18</p>                                                                                                                                                                                                                                                                                                        |

| Trial (Country)                                                                                                                                | Study Design                                          | Patient Population and Caregiver's Relationship to Patients                                                                                                                                                                                                                 | Caregiver Outcomes Assessed (Instrument)                                                             | Intervention                                                                                                                                                        |     | Comparator                                                                                                                |     | Results                                                                                                                                                                                                           |
|------------------------------------------------------------------------------------------------------------------------------------------------|-------------------------------------------------------|-----------------------------------------------------------------------------------------------------------------------------------------------------------------------------------------------------------------------------------------------------------------------------|------------------------------------------------------------------------------------------------------|---------------------------------------------------------------------------------------------------------------------------------------------------------------------|-----|---------------------------------------------------------------------------------------------------------------------------|-----|-------------------------------------------------------------------------------------------------------------------------------------------------------------------------------------------------------------------|
|                                                                                                                                                |                                                       |                                                                                                                                                                                                                                                                             |                                                                                                      | Description                                                                                                                                                         | n   | Description                                                                                                               | n   |                                                                                                                                                                                                                   |
|                                                                                                                                                |                                                       |                                                                                                                                                                                                                                                                             |                                                                                                      | other and (ii) make decisions about cancer-related issues.                                                                                                          |     |                                                                                                                           |     | Relationship satisfaction, after intervention: ES=0.34<br>Self-efficacy, after intervention: ES=-0.25                                                                                                             |
| <b>Sherwood <i>et al</i>, 2012 (USA)</b> <sup>77</sup>                                                                                         | Multi-site, individually-randomized controlled trial  | Patients: stage III or IV solid tumor. Setting = outpatient<br><br>Caregivers: family caregiver. Mean age = 55.0 years. Percentage female = 60%                                                                                                                             | Burden (CRS), communication (ENRICH), depression (CESD), mastery (7-item scale), symptom involvement | Telephone calls (3 for caregivers, 6 for patients) by a Master's prepared nurse with experience in oncology, with problem-solving techniques for symptom management | 112 | Attention control: same number of telephone calls by a research staff member without providing problem-solving techniques | 113 | Burden: $\beta=0.02$ ( $p=0.62$ )<br>Communication: $\beta=-0.60$ ( $p=0.07$ )<br>Depression: $\beta=1.34$ ( $p<0.01$ )<br>Mastery: $\beta=-0.90$ ( $p<0.01$ )<br>Symptom involvement: $\beta=-0.90$ ( $p<0.01$ ) |
| <b>von Heymann-Horan <i>et al</i>, 2018 (Denmark)</b> <sup>78</sup><br><br><b>von Heymann-Horan <i>et al</i>, 2019 (Denmark)</b> <sup>79</sup> | Single-site, individually-randomized controlled trial | Patients: incurable cancer. Setting = home. Mean age = 66 years. Percentage female = 54%<br><br>Caregivers: caregiver. Mean age = 45 years. Percentage female = 62%                                                                                                         | Anxiety (SC92), common coping (DCI), communication (DCI), depression (SC92)                          | Home-based specialized palliative care and dyadic psychological support (two 90-minute sessions, and as-needed monthly follow-up)                                   | 134 | Usual care                                                                                                                | 115 | Common coping: $\Delta=0.40$<br>Communication: $\Delta=0.66$                                                                                                                                                      |
| <b>Wang <i>et al</i>, 2021 (China)</b> <sup>80</sup>                                                                                           | Single-site, individually-randomized controlled trial | Patients: hematologic cancers. Setting = inpatient. Mean age = 49.4 years. Percentage female = 47%<br><br>Caregivers: patient's family members or close relatives, undertaking primary responsibility of caring for patient. Mean age = 38.3 years. Percentage female = 44% | Anxiety (SA), depression (SDS), family adaptability and cohesion (FACESII)                           | Four sessions of dyadic dignity therapy delivered by a therapist to the patient and family caregiver                                                                | 27  | Routine care                                                                                                              | 26  | Anxiety, over time: $F=5.88$ ( $p<0.01$ )<br>Depression, over time: $F=2.58$ ( $p=0.06$ )<br>Family adaptability, over time: $F=2.23$ ( $p=0.12$ )<br>Family cohesion, over time: $F=3.13$ ( $p=0.04$ )           |

| Trial (Country)                                        | Study Design                                          | Patient Population and Caregiver's Relationship to Patients                                                                                     | Caregiver Outcomes Assessed (Instrument)                                               | Intervention                                                                                                                                                                                                                          |    | Comparator  |    | Results                                                                                                                                                                                                                                                                                                                                                                                                      |
|--------------------------------------------------------|-------------------------------------------------------|-------------------------------------------------------------------------------------------------------------------------------------------------|----------------------------------------------------------------------------------------|---------------------------------------------------------------------------------------------------------------------------------------------------------------------------------------------------------------------------------------|----|-------------|----|--------------------------------------------------------------------------------------------------------------------------------------------------------------------------------------------------------------------------------------------------------------------------------------------------------------------------------------------------------------------------------------------------------------|
|                                                        |                                                       |                                                                                                                                                 |                                                                                        | Description                                                                                                                                                                                                                           | n  | Description | n  |                                                                                                                                                                                                                                                                                                                                                                                                              |
| <b>Yanwei <i>et al</i>, 2018 (China)</b> <sup>81</sup> | Single-site, individually-randomized controlled trial | Patients: stage IV non-small cell lung cancer. Setting = outpatient. Percentage female = 62%<br><br>Caregivers: Family. Percentage female = 47% | Anxiety (HADS), depression (HADS), family relationships (FES), quality of life (CQOLC) | At least four 30-minute sessions of multidisciplinary components over 8 weeks, including physical therapy, coping and communication strategies, and education about cancer symptoms, physical and mental health, and cancer treatment | 64 | Usual care  | 62 | Anxiety, at 12 weeks: 3.1 vs 0.9 ( $p<0.05$ )<br><br>Depression, at 12 weeks: 2.9 vs 0.5 ( $p<0.05$ )<br><br>Family relationships, cohesion, at 12 weeks: 0.6 vs 0.7 ( $p>0.05$ )<br><br>Family relationships, conflict, at 12 weeks: 1.7 vs 1.1 ( $p>0.05$ )<br><br>Family relationships, expressiveness, at 12 weeks: 0.7 vs 1.0 ( $p>0.05$ )<br><br>Quality of life, at 12 weeks: 3.9 vs 1.7 ( $p>0.05$ ) |

**Legend:**

- ACS – Appraisal of Caregiving Scale
- BC – Brief Cope
- BDI – Beck Depression Inventory
- BHS – Beck Hopelessness Scale
- CBI – Caregiver Burden Inventory
- CBurdenI – Caregiver Burden Inventory
- CESD – Center for Epidemiologic Studies – Depression
- CHES – Comprehensive Health Enhancement Support System
- COHQOL – City of Hope Quality of Life Instrument
- CPSS – Chronic Pain Self-Efficacy Scale
- CQOLC – Caregiver Quality of Life Index Cancer
- CRS – Caregiver Reaction Scale
- CSI – Caregiver Strain Index
- CSQ8 – Client Satisfaction Questionnaire
- DCI – Dyadic-Coping-Inventory
- ENRICH – ENRICH Marital Inventory
- FACESII – Family Adaptability and Cohesion Evaluation Scale – II
- FACT-Sp – Functional Assessment of Chronic Illness Therapy-Spiritual Well-Being Scale
- FACT – Functional Assessment of Cancer Therapy
- FACT-G – Functional Assessment of Cancer Therapy - General
- FACT-SWB – Functional Assessment of Cancer Therapy – Spiritual Well-Being Scale
- FCI – Family Care Inventory



FES – Family Environment Scale  
FFMQ-SF – Five Facet Mindfulness Questionnaire  
HADS – Hospital Anxiety and Depression Scale  
IES – Impact of Events Scale  
LASA – Linear Analog Self-Assessment items  
LCSS – Lewis Cancer Self-Efficacy Scale  
LMSS – Lewis Mutuality and Sensitivity Scale  
MBCB – Montgomery-Borgatta Caregiver Burden Scale  
MOCS – Measure of Current Status  
MSI – Marital Satisfaction Inventory  
MSIS – Miller Social Intimacy Scale  
MUIS – Mishel Uncertainty in Illness Scale  
NCCNDT – National Comprehensive Cancer Network Distress Thermometer  
PG13 – Prigerson Inventory of Complicated Grief-Short Form  
POMB – Profile of Mood States-B  
PROMIS SF Anxiety – 6-Item Patient Reported Outcomes Measurement Information System Short-Form Anxiety Measure  
PROMIS SF Depression – 6-Item Patient Reported Outcomes Measurement Information System Short-Form Depression Measure  
PROMIS SF Emotional Support – 4-Item Patient Reported Outcomes Measurement Information System Short-Form Emotional Support Measure  
PROMIS SF Fatigue – 6-Item Patient Reported Outcomes Measurement Information System Short-Form Fatigue Measure  
PTGI – Posttraumatic Growth Inventory  
RDAS – Revised Dyadic Adjustment Scale  
SA – Social Anxiety Scale  
SC92 – Symptom Checklist – 92  
SDS – Self-Rating Depression Scale  
SF36 – 36-Item Short-Form Health Survey  
SPSI – Social Problem Solving Inventory  
SSQ – Social Support Questionnaire  
SSS – Standard Self-Efficacy Scale  
SV-POMS – Shortened Version Profile of Mood States

**Supplementary Table 3.** Study Characteristics, of Interventions Directed at Patients and Their Families

| Trial (Country)                                                  | Study Design                                          | Patient Population and Caregiver's Relationship to Patients                                                                                                                                                                                                            | Caregiver Outcomes Assessed (Instrument)                                   | Intervention                                                                                                                         |     | Comparator               |    | Results                                                                                                                                                                                                                                                                                                                                             |
|------------------------------------------------------------------|-------------------------------------------------------|------------------------------------------------------------------------------------------------------------------------------------------------------------------------------------------------------------------------------------------------------------------------|----------------------------------------------------------------------------|--------------------------------------------------------------------------------------------------------------------------------------|-----|--------------------------|----|-----------------------------------------------------------------------------------------------------------------------------------------------------------------------------------------------------------------------------------------------------------------------------------------------------------------------------------------------------|
|                                                                  |                                                       |                                                                                                                                                                                                                                                                        |                                                                            | Description                                                                                                                          | n   | Description              | n  |                                                                                                                                                                                                                                                                                                                                                     |
| <b>Addington-Hall et al, 1992 (United Kingdom)</b> <sup>82</sup> | Multi-site, cluster-randomized controlled trial       | Patients: terminal cancer. Setting = outpatient. Percentage female = 54%<br><br>Caregivers: family. Percentage female = 70%                                                                                                                                            | Anxiety (HADS), anxiety (HADS)                                             | Nurse coordinators, to coordinate services for patient and family                                                                    | 104 | Usual care               | 99 | Anxiety, before death: OR=0.65 (95% CI: 0.31-1.37)<br><br>Anxiety, 8 weeks after death: OR=0.51 (95% CI: 0.19-1.31)<br><br>Depression, before death: OR=0.77 (95% CI: 0.36-1.64)<br><br>Depression, 8 weeks after death: OR=0.63 (95% CI: 0.27-1.47)                                                                                                |
| <b>Clark et al, 2006 (USA)</b> <sup>83</sup>                     | Single-site, individually-randomized controlled trial | Patients: advanced cancer. Setting = outpatient<br><br>Caregivers: primary caregiver. Mean age = 59.5 years. Percentage female = 75%                                                                                                                                   | Burden (interview), quality of life (LASA)                                 | Eight 90-minute structured patient-focused multidisciplinary intervention focused on strategies to improve patients' quality of life | 43  | Standard medical care    | 40 | Burden, at 4 weeks: 76.9 vs 76.2 ( $p=0.81$ )<br><br>Burden, at 8 weeks: 75.1 vs 75.8 ( $p=0.80$ )<br><br>Burden, at 27 weeks: 75.1 vs 77.2 ( $p=0.55$ )<br><br>Quality of life, at 4 weeks: 77.4 vs 75.9 ( $p=0.68$ )<br><br>Quality of life, at 8 weeks: 77.6 vs 76.3 ( $p=0.75$ )<br><br>Quality of life, at 27 weeks: 72.2 vs 78.9 ( $p=0.10$ ) |
| <b>El-Jawahri et al, 2016 (USA)</b> <sup>84</sup>                | Single-site, individually-randomized controlled trial | Patients: hematopoietic stem cell transplantation. Setting = inpatient. Mean age = 60. Percentage female = 57%<br><br>Caregiver: relative/friend who lived with patient or had in-person contact at least twice per week. Mean age = 54 years. Percentage female = 70% | Mood (HADS, PHQ-9), quality of life (CareGiver Oncology QOL questionnaire) | Inpatient palliative care focused on management of physical and psychological symptoms                                               | 49  | Standard transplant care | 45 | Anxiety, at 2 weeks: 6.24 vs 6.55 ( $p=0.95$ )<br><br>Coping, at 2 weeks: 12.70 vs 11.59 ( $p=0.02$ )<br><br>Depression (HADS), at 2 weeks: 4.05 vs 6.00 ( $p=0.03$ )<br><br>Depression (PHQ-9), at 2 weeks: 4.51 vs 4.96 ( $p=0.99$ )<br><br>Quality of life, at 2 weeks: 118.72 vs 113.32 ( $p=0.24$ )                                            |

| Trial (Country)                                          | Study Design                                          | Patient Population and Caregiver's Relationship to Patients                                                                                                                                       | Caregiver Outcomes Assessed (Instrument)            | Intervention                                        |     | Comparator          |     | Results                                                                                                                                                                                                                                                                                                                                                                                                                                                                                                                                                                                                                                                                                                                                                                                                                                                                                                                                                                                                                                                                                                                             |
|----------------------------------------------------------|-------------------------------------------------------|---------------------------------------------------------------------------------------------------------------------------------------------------------------------------------------------------|-----------------------------------------------------|-----------------------------------------------------|-----|---------------------|-----|-------------------------------------------------------------------------------------------------------------------------------------------------------------------------------------------------------------------------------------------------------------------------------------------------------------------------------------------------------------------------------------------------------------------------------------------------------------------------------------------------------------------------------------------------------------------------------------------------------------------------------------------------------------------------------------------------------------------------------------------------------------------------------------------------------------------------------------------------------------------------------------------------------------------------------------------------------------------------------------------------------------------------------------------------------------------------------------------------------------------------------------|
|                                                          |                                                       |                                                                                                                                                                                                   |                                                     | Description                                         | n   | Description         | n   |                                                                                                                                                                                                                                                                                                                                                                                                                                                                                                                                                                                                                                                                                                                                                                                                                                                                                                                                                                                                                                                                                                                                     |
| <b>El-Jawahri <i>et al</i>, 2017 (USA)</b> <sup>85</sup> | Single-site, individually-randomized controlled trial | <p>Patients: incurable lung or noncolorectal gastrointestinal cancer. Setting = outpatient</p> <p>Caregivers: caregiver identified by patient. Mean age = 57.4 years. Percentage female = 69%</p> | Anxiety (HADS), mood (HADS), quality of life (SF36) | Early palliative care integrated with oncology care | 137 | Usual oncology care | 138 | <p>Anxiety and mood, at 12 weeks: d = 0.30 (<math>p=0.029</math>)</p> <p>Anxiety and mood, at 24 weeks: d = 0.15 (<math>p=0.279</math>)</p> <p>Anxiety and mood, at 3 months before death: 6.84 vs 12.93 (<math>p=0.002</math>)</p> <p>Anxiety and mood, at 6 months before death: 7.88 vs 11.60 (<math>p=0.003</math>)</p> <p>Quality of life, physical component, at 12 weeks: d = 0.18 (<math>p=0.183</math>)</p> <p>Quality of life, physical component, at 24 weeks: d=0.06 (<math>p=0.669</math>)</p> <p>Quality of life, physical component, at 3 months before death: 52.69 vs 52.17 (<math>p=0.664</math>)</p> <p>Quality of life, physical component, at 6 months before death: 53.27 vs 52.14 (<math>p=0.299</math>)</p> <p>Quality of life, mental component, at 12 weeks: d = 0.12 (<math>p=0.376</math>)</p> <p>Quality of life, mental component, at 24 weeks: d=0.06 (<math>p=0.679</math>)</p> <p>Quality of life, mental component, at 3 months before death: 46.75 vs 46.01 (<math>p=0.579</math>)</p> <p>Quality of life, mental component, at 6 months before death: 47.10 vs 45.91 (<math>p=0.338</math>)</p> |
| <b>Kane <i>et al</i>, 1985 (USA)</b> <sup>86</sup>       | Single-site, individually-randomized controlled trial | <p>Patients: terminal cancer. Setting = home</p> <p>Caregivers: significant other. Percentage female = 83%</p>                                                                                    | Anxiety (GWM), depression (CESD), satisfaction      | Hospice program                                     | 136 | Usual care          | 110 | <p>Anxiety: <math>p&lt;0.05</math> for 3 of 5 cohorts (those completing 3/7, 4/7 and 5/7 interviews)</p> <p>Depression: <math>p&gt;0.05</math></p>                                                                                                                                                                                                                                                                                                                                                                                                                                                                                                                                                                                                                                                                                                                                                                                                                                                                                                                                                                                  |

| Trial (Country)                                                                                                                | Study Design                                          | Patient Population and Caregiver's Relationship to Patients                                                                                                                               | Caregiver Outcomes Assessed (Instrument)                                                              | Intervention                                                                            |              | Comparator                                     |     | Results                                                                                                                                                                                                                                                                                                                                                                                                                                                                                                                                                                                                                                                                                                                                                                             |
|--------------------------------------------------------------------------------------------------------------------------------|-------------------------------------------------------|-------------------------------------------------------------------------------------------------------------------------------------------------------------------------------------------|-------------------------------------------------------------------------------------------------------|-----------------------------------------------------------------------------------------|--------------|------------------------------------------------|-----|-------------------------------------------------------------------------------------------------------------------------------------------------------------------------------------------------------------------------------------------------------------------------------------------------------------------------------------------------------------------------------------------------------------------------------------------------------------------------------------------------------------------------------------------------------------------------------------------------------------------------------------------------------------------------------------------------------------------------------------------------------------------------------------|
|                                                                                                                                |                                                       |                                                                                                                                                                                           |                                                                                                       | Description                                                                             | n            | Description                                    | n   |                                                                                                                                                                                                                                                                                                                                                                                                                                                                                                                                                                                                                                                                                                                                                                                     |
|                                                                                                                                |                                                       |                                                                                                                                                                                           | (adapted scales)                                                                                      |                                                                                         |              |                                                |     | Satisfaction with involvement in care: $p < 0.01$ for 2 of 5 cohorts (those completing 5/7 and 6/7 interviews)                                                                                                                                                                                                                                                                                                                                                                                                                                                                                                                                                                                                                                                                      |
| <b>Kissane <i>et al</i>, 2006 (Australia)</b> <sup>87</sup><br><br><b>Kissane <i>et al</i>, 2007 (Australia)</b> <sup>88</sup> | Multi-site, individually-randomized controlled trial  | Patients: cancer prognosis of 6 months. Setting = outpatient. Mean age = 57 years. Percentage female = 49%<br><br>Caregivers: family member. Mean age = 37 years. Percentage female = 52% | Depression (BDI), distress (BSI), family functioning (FES, FAD), grief (BPQ), social adjustment (SAS) | Four to eight 90-minute family focused grief therapy sessions                           | 233          | Standard palliative care by home-care programs | 130 | Depression, at 6 months: $\Delta = 0.64$ ( $p = 0.22$ )<br><br>Depression, at 13 months: $\Delta = 0.26$ ( $p = 0.52$ )<br><br>Distress, at 6 months: $\Delta = 0.04$ ( $p = 0.36$ )<br><br>Distress, at 13 months: $\Delta = 0.11$ ( $p = 0.02$ )<br><br>Family functioning (FES), at 6 months: $\Delta = -0.22$ ( $p = 0.76$ )<br><br>Family functioning (FES), at 13 months: $\Delta = -0.07$ ( $p = 0.92$ )<br><br>Family functioning (FAD), at 6 months: $\Delta = 0.06$ ( $p = 0.65$ )<br><br>Family functioning (FAD), at 13 months: $\Delta = 0.03$ ( $p = 0.95$ )<br><br>Grief, at 13 months: $\Delta = -0.48$ ( $p = 0.92$ )<br><br>Social adjustment, at 6 months: $\Delta = 0.01$ ( $p = 0.32$ )<br><br>Social adjustment, at 13 months: $\Delta = 0.03$ ( $p = 0.43$ ) |
| <b>Kissane <i>et al</i>, 2016 (USA)</b> <sup>89</sup>                                                                          | Single-site, individually-randomized controlled trial | Patients: advanced cancer. Setting = mixed<br><br>Caregivers: partners and other relatives                                                                                                | Depression (BDI), grief (CGI)                                                                         | 6 family focused grief therapy sessions<br><br>10 family focused grief therapy sessions | 59<br><br>56 | Usual care                                     | 55  | Depression: $\chi^2 = 1.00$ ( $p = 0.61$ )<br><br>Grief: $\chi^2 = 6.88$ ( $p = 0.03$ )                                                                                                                                                                                                                                                                                                                                                                                                                                                                                                                                                                                                                                                                                             |
| <b>Kleijn <i>et al</i>, 2021 (Netherlands)</b> <sup>90</sup>                                                                   | Single-site, individually-randomized controlled trial | Patients: incurably ill cancer. Setting = mixed<br><br>Caregivers: informal caregiver. Mean age =                                                                                         | Anxiety (HADS), burden (CRA), depression                                                              | Four weekly 1-hour life review therapy with memory specificity                          | 35           | Usual care                                     | 29  | Anxiety, over time: $F = 1.27$ ( $p = 0.29$ )<br><br>Burden, disrupted schedule, over time: $F = 0.07$ ( $p = 0.93$ )                                                                                                                                                                                                                                                                                                                                                                                                                                                                                                                                                                                                                                                               |

| Trial (Country)                                              | Study Design                                    | Patient Population and Caregiver's Relationship to Patients                                                                               | Caregiver Outcomes Assessed (Instrument)                        | Intervention                                        |    | Comparator             |    | Results                                                                                                                                                                                                                                                                                                                                                                                                                                                                                                                                                                                                                                                                                                                                                                                                                                                                                                                                                                                                                                                                                                                      |
|--------------------------------------------------------------|-------------------------------------------------|-------------------------------------------------------------------------------------------------------------------------------------------|-----------------------------------------------------------------|-----------------------------------------------------|----|------------------------|----|------------------------------------------------------------------------------------------------------------------------------------------------------------------------------------------------------------------------------------------------------------------------------------------------------------------------------------------------------------------------------------------------------------------------------------------------------------------------------------------------------------------------------------------------------------------------------------------------------------------------------------------------------------------------------------------------------------------------------------------------------------------------------------------------------------------------------------------------------------------------------------------------------------------------------------------------------------------------------------------------------------------------------------------------------------------------------------------------------------------------------|
|                                                              |                                                 |                                                                                                                                           |                                                                 | Description                                         | n  | Description            | n  |                                                                                                                                                                                                                                                                                                                                                                                                                                                                                                                                                                                                                                                                                                                                                                                                                                                                                                                                                                                                                                                                                                                              |
|                                                              |                                                 | 61.6 years. Percentage female = 61%                                                                                                       | (HADS), distress (HADS), posttraumatic growth (PTGI)            | training sessions for patients, led by psychologist |    |                        |    | <p>Burden, financial problems, over time: <math>F=0.33</math> (<math>p=0.72</math>)</p> <p>Burden, lack of family support, over time: <math>F=0.31</math> (<math>p=0.74</math>)</p> <p>Burden, health problems, over time: <math>F=0.23</math> (<math>p=0.80</math>)</p> <p>Burden, self-esteem, over time: <math>F=4.57</math> (<math>p=0.01</math>)</p> <p>Depression, over time: <math>F=0.92</math> (<math>p=0.40</math>)</p> <p>Distress, over time: <math>F=1.27</math> (<math>p=0.29</math>)</p> <p>Posttraumatic growth, total, over time: <math>F=0.62</math> (<math>p=0.54</math>)</p> <p>Posttraumatic growth, relating to others, over time: <math>F=0.31</math> (<math>p=0.73</math>)</p> <p>Posttraumatic growth, new possibilities, over time: <math>F=0.85</math> (<math>p=0.43</math>)</p> <p>Posttraumatic growth, personal strength, over time: <math>F=1.38</math> (<math>p=0.26</math>)</p> <p>Posttraumatic growth, spiritual change, over time: <math>F=0.29</math> (<math>p=0.75</math>)</p> <p>Posttraumatic growth, appreciation of life, over time: <math>F=0.77</math> (<math>p=0.47</math>)</p> |
| <b>McDonald <i>et al</i>, 2017 (Canada)</b><br><sup>91</sup> | Multi-site, cluster-randomized controlled trial | <p>Patients: stage III-IV cancer. Setting = outpatient</p> <p>Caregivers: not defined. Mean age = 57.5 years. Percentage female = 65%</p> | Satisfaction with care (FAMCARE), quality of life (CQOLC, SF36) | Early outpatient palliative care                    | 94 | Standard oncology care | 88 | <p>Satisfaction with care, at 3 months: <math>\beta=1.47</math> (<math>p&lt;0.01</math>)</p> <p>Satisfaction with care, at 4 months: <math>\beta=0.89</math> (<math>p=0.02</math>)</p> <p>Quality of life (CQOLC), at 3 months: <math>\beta=0.11</math> (<math>p=0.92</math>)</p>                                                                                                                                                                                                                                                                                                                                                                                                                                                                                                                                                                                                                                                                                                                                                                                                                                            |

| Trial (Country)                                          | Study Design                                          | Patient Population and Caregiver's Relationship to Patients                                                                                                                           | Caregiver Outcomes Assessed (Instrument)            | Intervention                                                                                                                                                               |     | Comparator        |    | Results                                                                                                                                                                                                                                                                                                                                                                                                                                                                                                                                         |
|----------------------------------------------------------|-------------------------------------------------------|---------------------------------------------------------------------------------------------------------------------------------------------------------------------------------------|-----------------------------------------------------|----------------------------------------------------------------------------------------------------------------------------------------------------------------------------|-----|-------------------|----|-------------------------------------------------------------------------------------------------------------------------------------------------------------------------------------------------------------------------------------------------------------------------------------------------------------------------------------------------------------------------------------------------------------------------------------------------------------------------------------------------------------------------------------------------|
|                                                          |                                                       |                                                                                                                                                                                       |                                                     | Description                                                                                                                                                                | n   | Description       | n  |                                                                                                                                                                                                                                                                                                                                                                                                                                                                                                                                                 |
|                                                          |                                                       |                                                                                                                                                                                       |                                                     |                                                                                                                                                                            |     |                   |    | <p>Quality of life (CQOLC), at 4 months: <math>\beta=0.50</math> (<math>p=0.51</math>)</p> <p>Quality of life (SF36), physical component, at 3 months: <math>\beta=0.07</math> (<math>p=0.83</math>)</p> <p>Quality of life (SF36), physical component, at 4 months: <math>\beta=0.17</math> (<math>p=0.20</math>)</p> <p>Quality of life (SF36), mental component, at 3 months: <math>\beta=0.07</math> (<math>p=0.87</math>)</p> <p>Quality of life (SF36), mental component, at 4 months: <math>\beta=-0.17</math> (<math>p=0.60</math>)</p> |
| <b>O'Hara <i>et al</i>, 2010 (USA)</b> <sup>92</sup>     | Single-site, individually-randomized controlled trial | <p>Patients: advanced cancer. Setting = outpatient</p> <p>Caregivers: someone close to the patient who was involved with care. Mean age = 58.9 years. Percentage female = 77%</p>     | Burden (Montgomery Borgatta Caregiver Burden Scale) | Educate, Nurture, Advise Before Life Ends (ENABLE) intervention: four weekly telephone sessions with patients by specialized nurse educators, and monthly calls thereafter | 108 | Standard care     | 90 | Burden: $p > 0.05$                                                                                                                                                                                                                                                                                                                                                                                                                                                                                                                              |
| <b>Ringdal <i>et al</i>, 2001 (Norway)</b> <sup>93</sup> | Single-site, cluster-randomized controlled trial      | <p>Patients: advanced cancer. Setting = mixed. Mean age = 68.4 years. Percentage female = 47%</p> <p>Caregivers: family or friend. Mean age = 56.3 years. Percentage female = 68%</p> | Grief (TRIG)                                        | Team-based comprehensive palliative care                                                                                                                                   | 113 | Conventional care | 70 | Grief, 0 to 13 months: $f=8.15$ ( $p<0.01$ )                                                                                                                                                                                                                                                                                                                                                                                                                                                                                                    |
| <b>Schenker <i>et al</i>, 2018 (USA)</b> <sup>94</sup>   | Single-site, individually-                            | Patients: locally advanced or metastatic pancreatic cancer.                                                                                                                           | Burden (Zarit burden interview),                    | In-person palliative care visits with                                                                                                                                      | 20  | Usual care        | 10 | <p>Burden, at 3 months: <math>\Delta=3.0</math> vs <math>\Delta=-0.3</math></p> <p>Mood, anxiety, at 3 months: <math>\Delta=-2.1</math> vs <math>\Delta=-2.3</math></p>                                                                                                                                                                                                                                                                                                                                                                         |

| Trial (Country)                              | Study Design                                          | Patient Population and Caregiver's Relationship to Patients                                                                                                                                                                                                                              | Caregiver Outcomes Assessed (Instrument)                                                  | Intervention                                                                                                                                                           |     | Comparator                                                                                                                                                                             |     | Results                                                                                                                                                                                                                                                                                                                                                                                                                                             |
|----------------------------------------------|-------------------------------------------------------|------------------------------------------------------------------------------------------------------------------------------------------------------------------------------------------------------------------------------------------------------------------------------------------|-------------------------------------------------------------------------------------------|------------------------------------------------------------------------------------------------------------------------------------------------------------------------|-----|----------------------------------------------------------------------------------------------------------------------------------------------------------------------------------------|-----|-----------------------------------------------------------------------------------------------------------------------------------------------------------------------------------------------------------------------------------------------------------------------------------------------------------------------------------------------------------------------------------------------------------------------------------------------------|
|                                              |                                                       |                                                                                                                                                                                                                                                                                          |                                                                                           | Description                                                                                                                                                            | n   | Description                                                                                                                                                                            | n   |                                                                                                                                                                                                                                                                                                                                                                                                                                                     |
|                                              | randomized controlled trial                           | Setting = outpatient. Mean age = 63. Percentage female = 50%<br><br>Caregivers: family member or friend. Mean age = 62. Percentage female = 53%                                                                                                                                          | mood (HADS)                                                                               | speciality-trained palliative care physician                                                                                                                           |     |                                                                                                                                                                                        |     | Mood, depression, at 3 months: $\Delta=-1.5$ vs $-1.3$<br><br>Mood, distress, at 3 months: $\Delta=-0.9$ vs $-1.6$                                                                                                                                                                                                                                                                                                                                  |
| <b>Steel et al, 2016 (USA)</b> <sup>95</sup> | Single-site, individually-randomized controlled trial | Patients: hepatocellular carcinoma, cholangiocarcinoma, gallbladder carcinoma, neuroendocrine carcinoma, pancreatic carcinoma or other primary cancers that had metastasized to liver. Setting = mixed. Mean age = 61 years. Percentage female = 27%<br><br>Caregivers: family caregiver | Depression (CESD), stress                                                                 | Patient access to a psychoeducation website and face-to-face and phone contact with a care coordinator experienced in cognitive behavioral therapy and psycho-oncology | 124 | Enhanced usual care: usual medical care with contact by a care coordinator and appropriate education and referral if patients or caregivers scored high on depression or pain measures | 100 | Depression, at 6 months: $d=0.37$ ( $p=0.10$ )<br><br>Stress, at 6 months: $d=0.75$ ( $p=0.05$ )                                                                                                                                                                                                                                                                                                                                                    |
| <b>Xu et al, 2021 (China)</b> <sup>96</sup>  | Single-site, individually-randomized controlled trial | Patients: terminal cancer. Setting = inpatient. Mean age = 74.8 years. Percentage female = 47%<br><br>Caregivers: immediate family member. Mean age = 37.0 years. Percentage female = 57%                                                                                                | Anxiety (HAMA), depression (HAMD), satisfaction (NSS), sleep quality (PSQI), stress (RSS) | Palliative care intervention encompassing face-to-face communication, death education, psychological support, and symptom-based conservative treatment                 | 51  | Routine end-of-life care                                                                                                                                                               | 51  | Anxiety, baseline to after intervention: $\Delta=-4.12$ vs $\Delta=-1.40$ ( $p<0.01$ )<br><br>Depression, baseline to after intervention: $\Delta=-2.55$ vs $\Delta=-0.88$ ( $p<0.01$ )<br><br>Satisfaction: 96% vs 82% ( $p<0.05$ )<br><br>Sleep, baseline to after intervention: $\Delta=-3.98$ vs $\Delta=-1.43$ ( $p<0.01$ )<br><br>Stress, psychological stress, baseline to after intervention: $\Delta=-1.46$ vs $\Delta=-0.80$ ( $p<0.05$ ) |

| Trial (Country) | Study Design | Patient Population and Caregiver's Relationship to Patients | Caregiver Outcomes Assessed (Instrument) | Intervention |   | Comparator  |   | Results                                                                                                                                                                                                               |
|-----------------|--------------|-------------------------------------------------------------|------------------------------------------|--------------|---|-------------|---|-----------------------------------------------------------------------------------------------------------------------------------------------------------------------------------------------------------------------|
|                 |              |                                                             |                                          | Description  | n | Description | n |                                                                                                                                                                                                                       |
|                 |              |                                                             |                                          |              |   |             |   | Stress, disrupted life, baseline to after intervention: $\Delta=-1.39$ vs $\Delta=-0.65$ ( $p<0.01$ )<br><br>Stress, negative emotions, baseline to after intervention: $\Delta=-1.18$ vs $\Delta=-0.59$ ( $p<0.01$ ) |

**Legend:**

BDI – Beck Depression Inventory  
 BPQ – Bereavement Phenomenology Questionnaire  
 BSI – Beck Symptom Inventory  
 CESD – Center for Epidemiological Studies Depression Scale  
 CGI – Complicated Grief Inventory  
 CQOLC – Caregiver Quality of Life Index – Cancer  
 CRA – Caregivers Reaction Assessment Scale  
 FAD – Family Assessment Device  
 FAMCARE – Family Satisfaction with End of Life Care Questionnaire  
 FES – Family Environment Scale  
 GWM – General Well-Being Measure  
 HADS – Hospital Anxiety and Depression Scale  
 HAMA – Hamilton Anxiety Scale  
 HAMD – Hamilton Depression Scale  
 LASA – Linear Analog Self-Assessment items  
 NSS – Nursing Satisfaction Survey Scale  
 PHQ-9 – Patient Health Questionnaire-9  
 PSQI – Pittsburgh Sleep Quality Index  
 PTGI – Posttraumatic Growth Inventory  
 RSS – Relative Stress Scale  
 SAS – Social Adjustment Scale  
 SF36 – 36-Item Short-Form Health Survey  
 TRIG – Texas Revised Inventory of Grief



# Supplementary Figure 1

## 1.1

| Study                                                              | Risk of bias domains |    |    |    |    | Overall |
|--------------------------------------------------------------------|----------------------|----|----|----|----|---------|
|                                                                    | D1                   | D2 | D3 | D4 | D5 |         |
| Addington-Hall et al. 1992                                         | -                    | X  | X  | X  | -  | X       |
| Annunzi et al. 2018                                                | +                    | X  | X  | X  | +  | X       |
| Arias-Rojas et al. 2020                                            | +                    | X  | X  | X  | +  | X       |
| Aubin et al. 2021                                                  | +                    | +  | +  | X  | +  | +       |
| Badr et al. 2015                                                   | -                    | +  | +  | X  | -  | -       |
| Boole et al. 2013                                                  | -                    | X  | X  | X  | +  | X       |
| Chih et al. 2013 and DuBenske et al. 2013 and Namkoong et al. 2012 | +                    | +  | +  | X  | +  | +       |
| Clark et al. 2006                                                  | -                    | +  | +  | X  | -  | -       |
| Clark et al. 2013 and Lapid et al. 2016                            | +                    | +  | +  | X  | -  | -       |
| Donne-Odom et al. 2015 and 2016                                    | +                    | +  | +  | X  | +  | +       |
| El-Jawahri et al. 2016                                             | +                    | +  | +  | X  | +  | +       |
| El-Jawahri et al. 2017                                             | +                    | +  | +  | X  | +  | +       |
| El-Jawahri et al. 2020                                             | +                    | +  | +  | X  | +  | +       |
| Ferrell et al. 2019                                                | -                    | X  | X  | X  | -  | X       |
| Hudson et al. 2005                                                 | +                    | X  | X  | X  | -  | X       |
| Hudson et al. 2013 and 2015                                        | +                    | +  | +  | X  | -  | -       |
| Kane et al. 1984                                                   | -                    | X  | X  | X  | -  | X       |
| Kocfo et al. 2005                                                  | +                    | X  | X  | X  | -  | X       |
| Kissane et al. 2006 and 2007                                       | +                    | +  | X  | X  | -  | X       |
| Kissane et al. 2016                                                | +                    | +  | X  | X  | +  | X       |
| Kleijn et al. 2021                                                 | -                    | X  | X  | X  | +  | X       |
| Kubo et al. 2020                                                   | -                    | X  | X  | X  | +  | X       |
| Laudenlager et al. 2015                                            | -                    | +  | X  | X  | +  | X       |
| Loow et al. 2015                                                   | X                    | +  | X  | X  | -  | X       |
| Li et al. 2019                                                     | +                    | X  | X  | X  | -  | X       |
| McDonald et al. 2017                                               | +                    | +  | +  | X  | +  | +       |
| McLean et al. 2013                                                 | -                    | X  | +  | X  | -  | X       |
| McMillan et al. 2006                                               | +                    | +  | X  | X  | -  | X       |
| Meyers et al. 2011                                                 | -                    | X  | X  | X  | -  | X       |
| Milbury et al. 2020                                                | +                    | X  | +  | X  | -  | X       |
| Micholl et al. 2013                                                | +                    | X  | X  | X  | -  | X       |
| Moshier et al. 2018                                                | +                    | +  | X  | X  | -  | X       |
| Northouse et al. 2005                                              | -                    | +  | +  | X  | -  | -       |
| Northouse et al. 2013                                              | -                    | X  | X  | X  | +  | X       |
| O'Hara et al. 2010                                                 | +                    | X  | +  | X  | +  | +       |
| Pensak et al. 2020                                                 | +                    | X  | X  | X  | +  | X       |
| Porter et al. 2017                                                 | +                    | +  | +  | X  | -  | -       |
| Ringdal et al. 2001                                                | -                    | +  | X  | X  | -  | X       |
| Schenker et al. 2018                                               | -                    | X  | X  | X  | +  | X       |
| Sherwood et al. 2012                                               | -                    | +  | -  | X  | -  | -       |
| Steel et al. 2016                                                  | +                    | X  | X  | X  | -  | X       |
| von Hoymann Horan et al. 2018 and 2019                             | +                    | X  | X  | X  | -  | X       |
| Walsh et al. 2007                                                  | +                    | X  | X  | X  | -  | X       |
| Wang et al. 2021                                                   | +                    | +  | X  | X  | +  | X       |
| Washington et al. 2018                                             | -                    | +  | -  | X  | +  | -       |
| Xu et al. 2021                                                     | -                    | X  | X  | X  | +  | X       |
| Yanwei et al. 2018                                                 | -                    | X  | -  | X  | -  | X       |
| Younis et al. 2019                                                 | -                    | X  | X  | X  | -  | X       |
| Yun et al. 2011                                                    | +                    | X  | X  | X  | -  | X       |

Domains:  
D1: Bias arising from the randomization process.  
D2: Bias due to deviations from intended intervention.  
D3: Bias due to missing outcome data.  
D4: Bias in measurement of the outcome.  
D5: Bias in selection of the reported result.

Judgement:  
High (Red circle with X)  
Some concerns (Yellow circle with -)  
Low (Green circle with +)

**Legend:**  
Supplementary Figure 1.1. Cochrane Risk of Bias Assessment By Study.

## 1.2

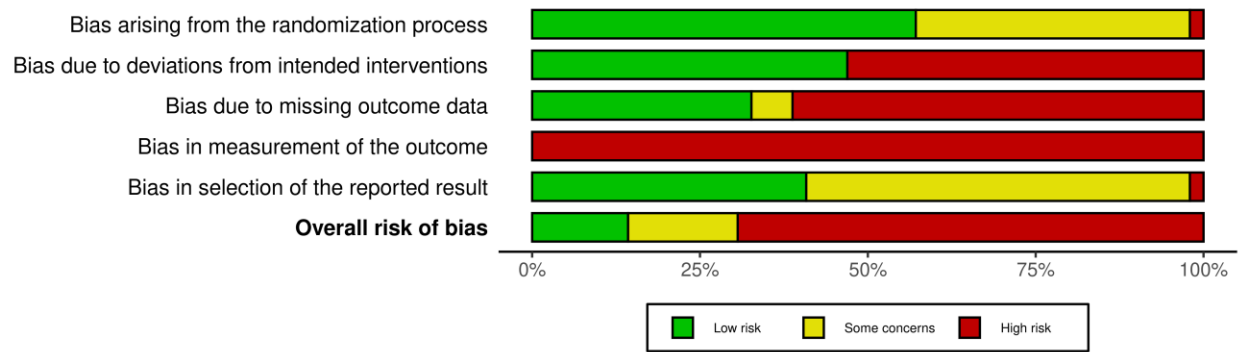

**Legend:**

Supplementary Figure 1.2. Cochrane Risk of Bias Assessment Summary.

## Supplementary Figure 2

### 2.1

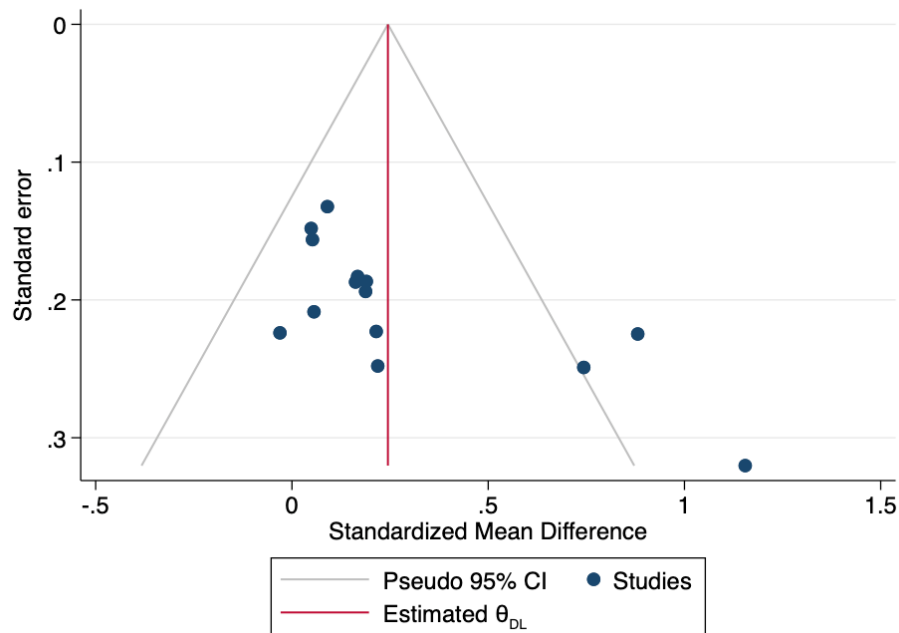

**Legend:**

Supplementary Figure 2.1. Overall Quality of Life Funnel Plot, for Assessment of Publication Bias at 1-3 Months ( $p < 0.001$ ).

### 2.2

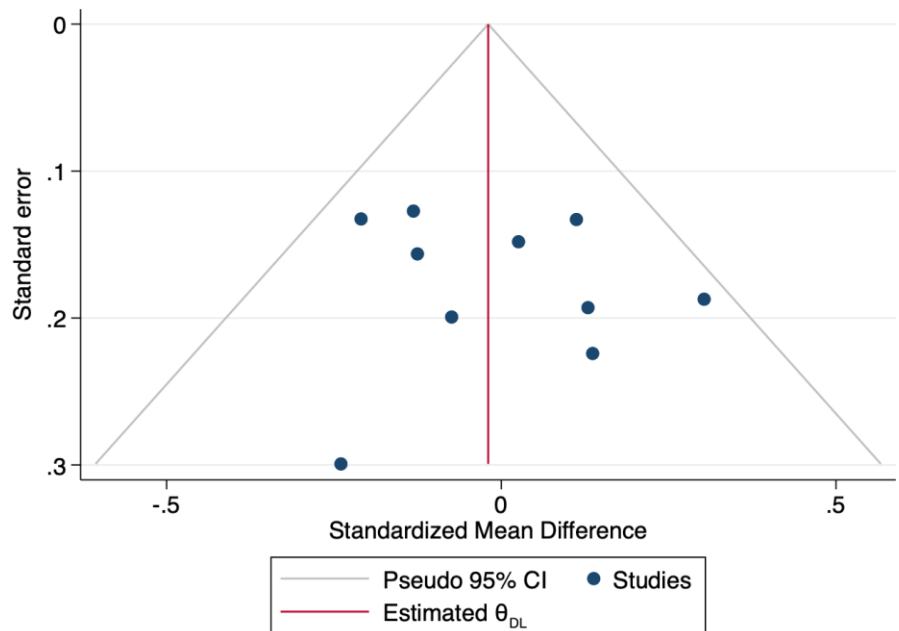

**Legend:**

Supplementary Figure 2.2. Physical Well-being Funnel Plot, for Assessment of Publication Bias at 1-3 Months ( $p = 0.533$ ).

### 2.3

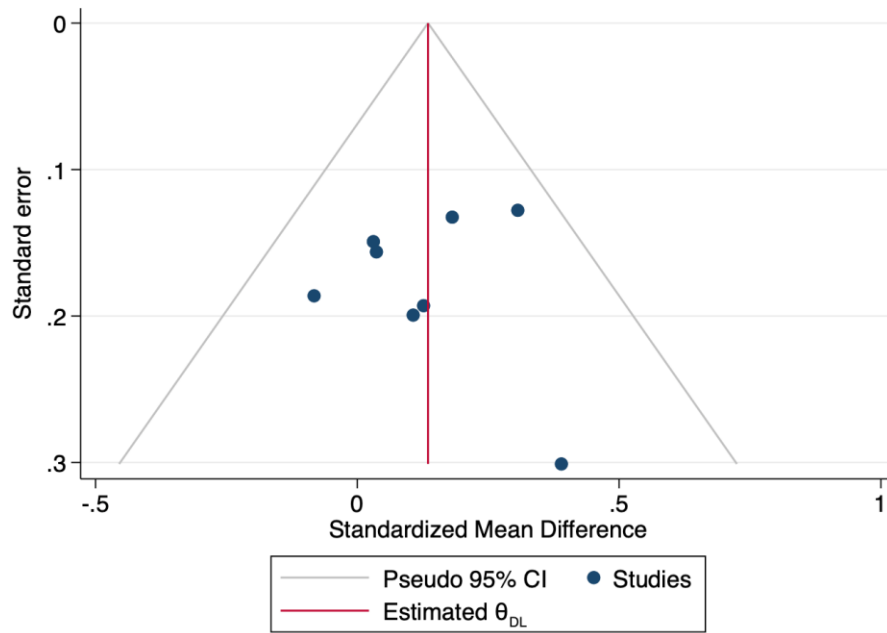

**Legend:**

Supplementary Figure 2.3. Mental Well-being Funnel Plot, for Assessment of Publication Bias at 1-3 Months ( $p=0.819$ ).

### 2.4

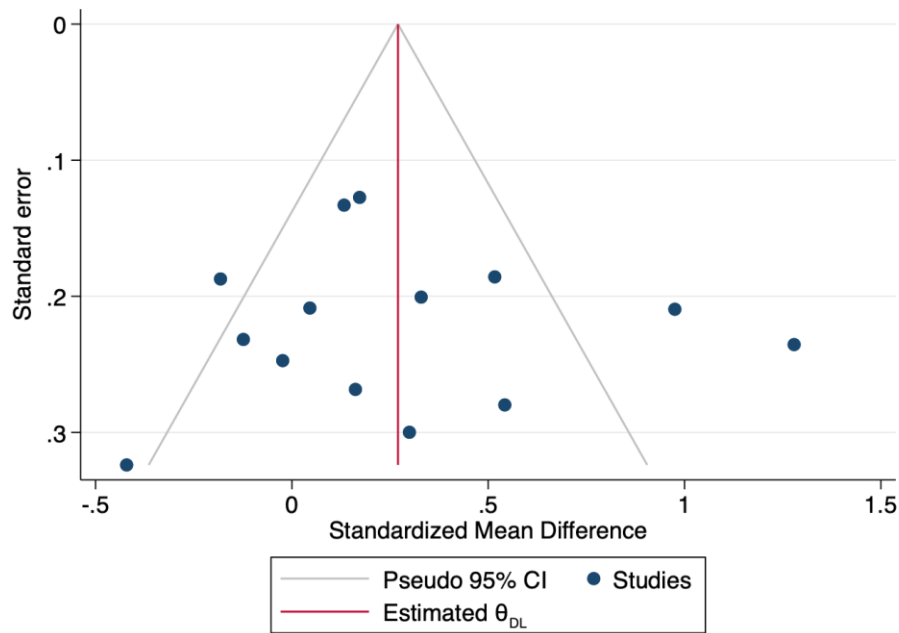

**Legend:**

Supplementary Figure 2.4. Anxiety Funnel Plot, for Assessment of Publication Bias at 1-3 Months ( $p=0.868$ ).

## 2.5

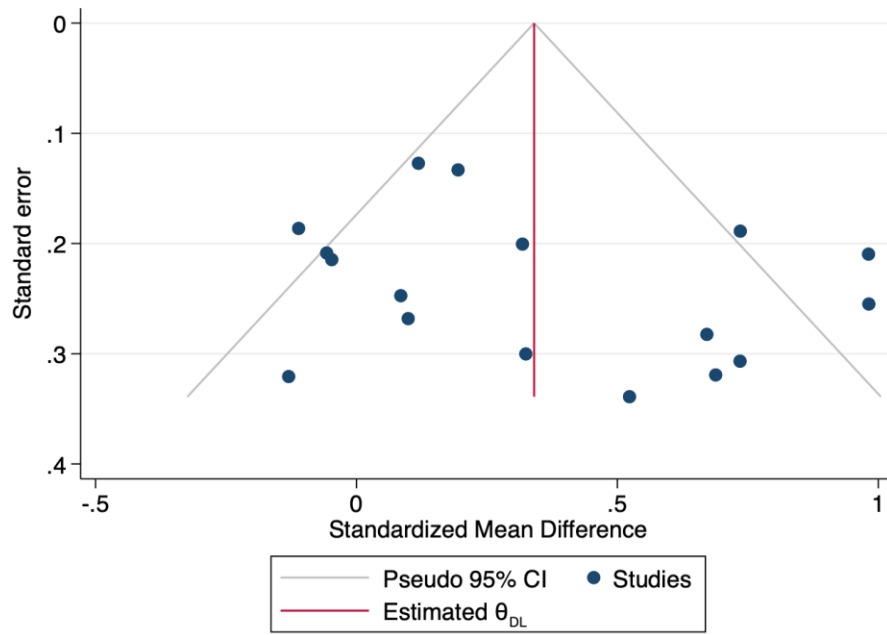

**Legend:**

Supplementary Figure 2.5. Depression Funnel Plot, for Assessment of Publication Bias at 1-3 Months ( $p=0.284$ ).

## Supplementary Figure 3

### 3.1

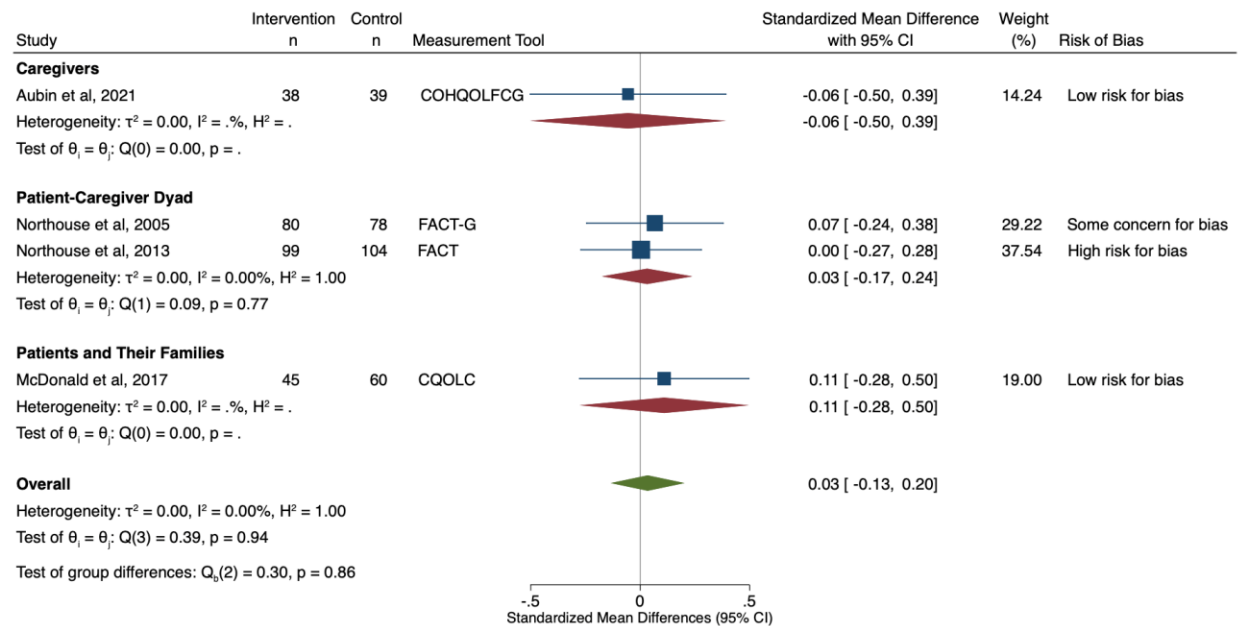

Random-effects DerSimonian-Laird model

#### Legend:

Supplementary Figure 3.1. Overall Quality of Life Caregiver-Reported Outcomes, at 4-6 Months.

COHQOLFCG – City of Hope Quality of Life Family Caregiver Version

CQOLC – Caregiver Quality of Life Index – Cancer

FACT – Functional Assessment of Cancer Therapy

FACT-G – Functional Assessment of Cancer Therapy - General

## 3.2

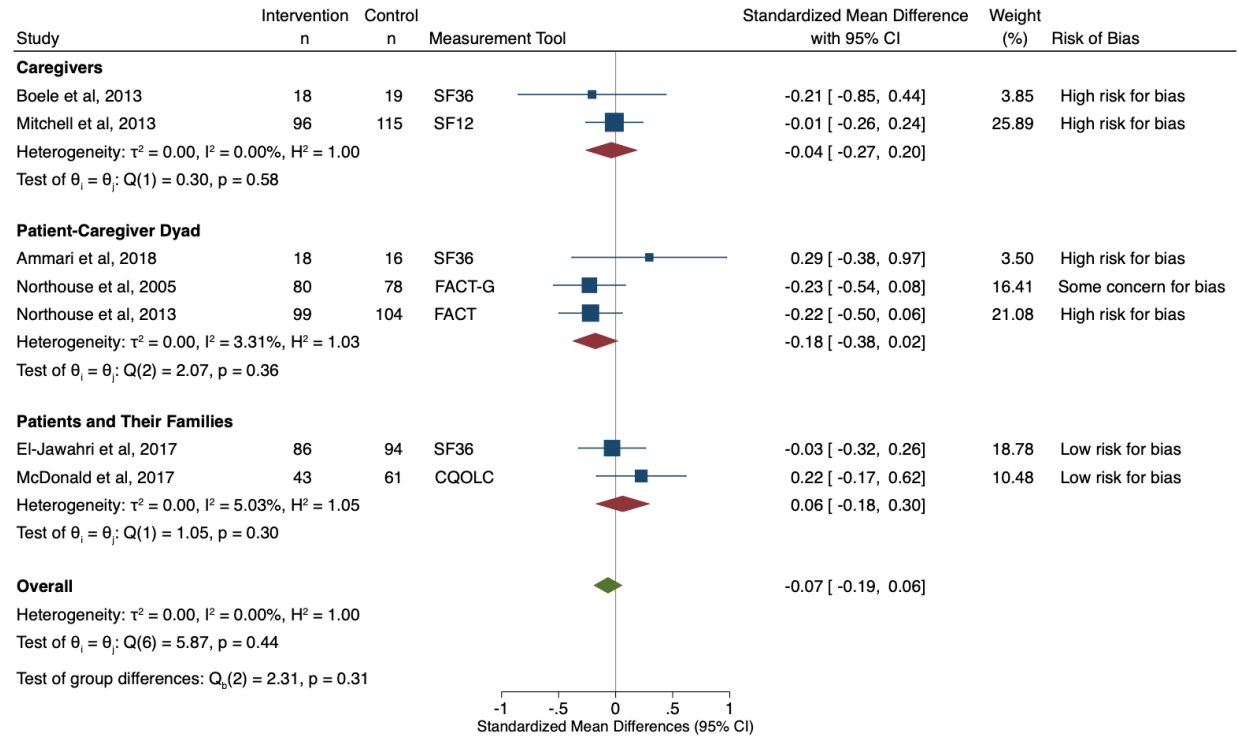

Random-effects DerSimonian-Laird model

### Legend:

Supplementary Figure 3.2. Physical Well-Being Caregiver-Reported Outcomes, at 4-6 Months.

CQOLC – Caregiver Quality of Life Index – Cancer  
 FACT – Functional Assessment of Cancer Therapy  
 FACT-G – Functional Assessment of Cancer Therapy - General  
 SF12 – 12-Item Short-Form Health Survey  
 SF36 – 36-Item Short-Form Health Survey

### 3.3

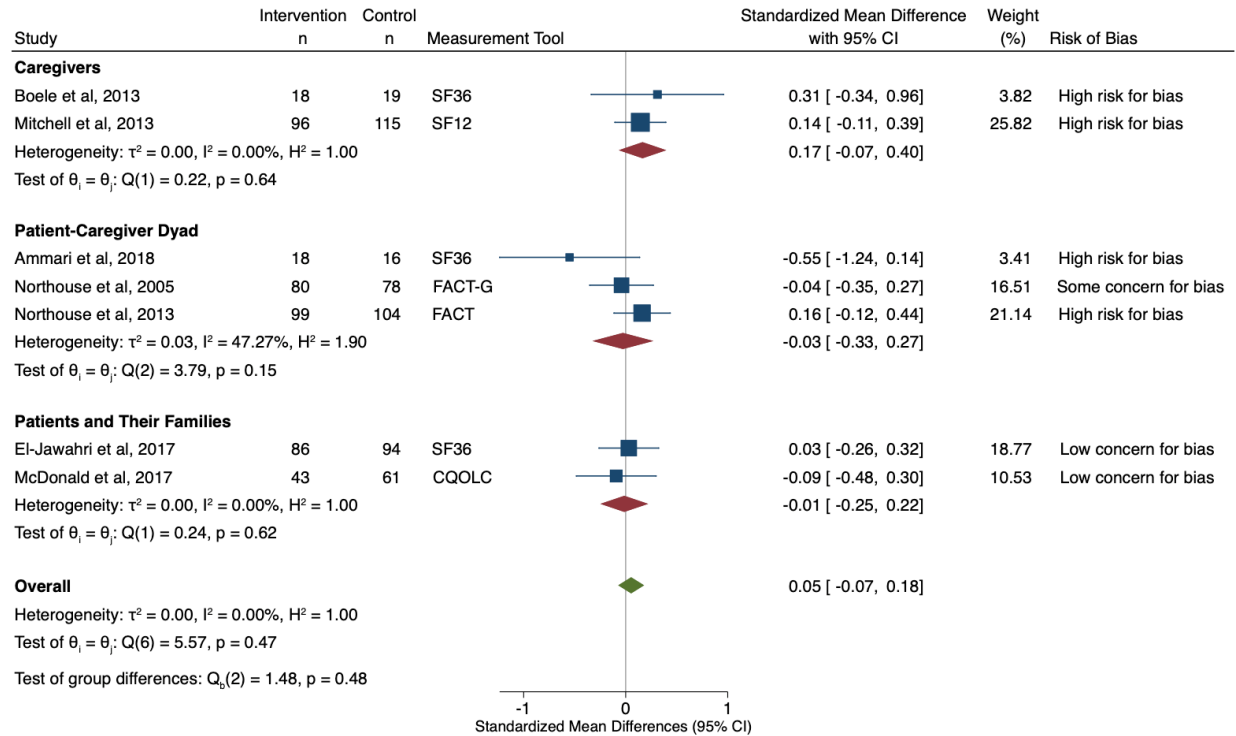

Random-effects DerSimonian-Laird model

#### Legend:

Supplementary Figure 3.3. Mental Well-Being Caregiver-Reported Outcomes, at 4-6 Months.

CQOLC – Caregiver Quality of Life Index – Cancer

FACT – Functional Assessment of Cancer Therapy

FACT-G – Functional Assessment of Cancer Therapy - General

SF12 – 12-Item Short-Form Health Survey

SF36 – 36-Item Short-Form Health Survey



### 3.4

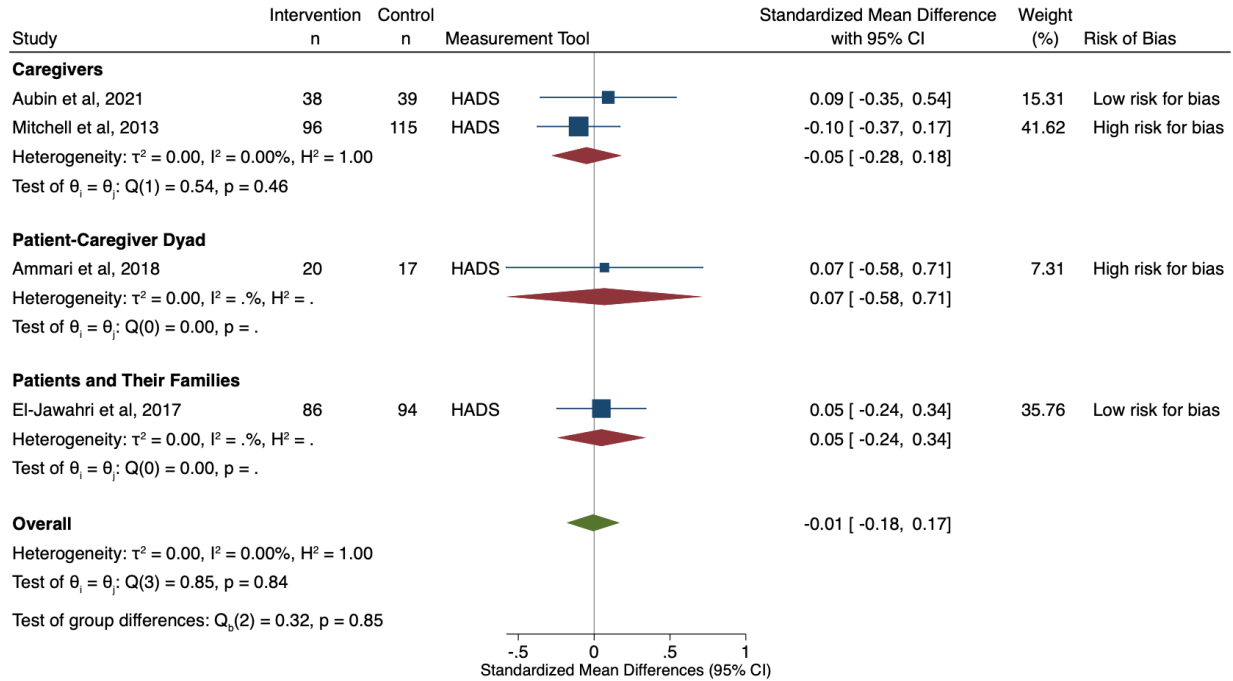

Random-effects DerSimonian–Laird model

**Legend:**

Supplementary Figure 3.4. Anxiety Caregiver-Reported Outcomes, at 4-6 Months.

HADS – Hospital Anxiety and Depression Scale  
HAMA – Hamilton Anxiety Scale

### 3.5

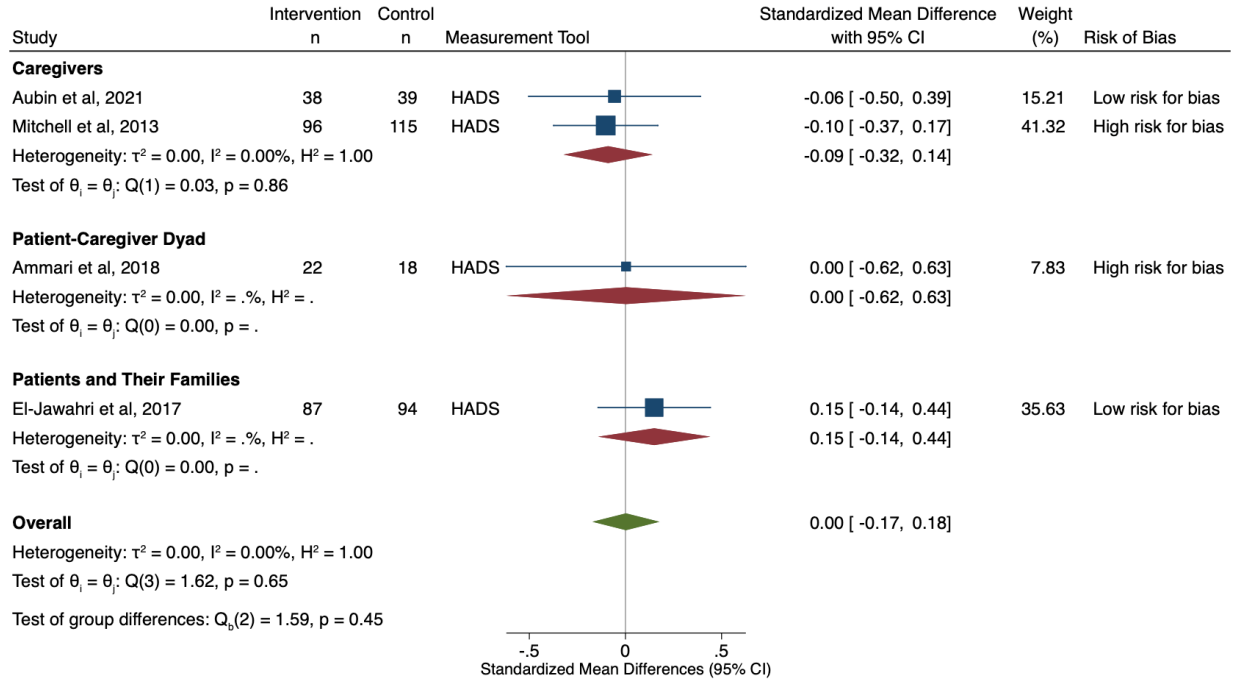

Random-effects DerSimonian–Laird model

**Legend:**

Supplementary Figure 3.5. Depression Caregiver-Reported Outcomes, at 4-6 Months.

HADS – Hospital Anxiety and Depression Scale
